# Supplementary material for: Catalytic Antioxidant Activity of Bis-Aniline-Derived Diselenides as GPx Mimics
Source: MDPI journal article supplement (doi:10.3390/molecules26154446), 2021-07-23
Supplement: s1 [file s1]

# Catalytic Antioxidant Activity of Bis-Aniline-Derived Diselenides as GPx Mimics

Giancarlo V. Botteselle <sup>1,\*</sup>, Welman C. Elias <sup>2</sup>, Luana Bettanin <sup>2</sup>, Rômulo F. S. Canto <sup>3</sup>, Drielly N. O. Salin <sup>2</sup>, Flavio A. R. Barbosa <sup>2</sup>, Sumbal Saba <sup>4</sup>, Hugo Gallardo <sup>2</sup>, Gianluca Ciancaleoni <sup>5</sup>, Josiel B. Domingos <sup>2</sup>, Jamal Rafique <sup>6,\*</sup> and Antonio L. Braga <sup>2,7,\*</sup>

<sup>1</sup> Departamento de Química, Universidade Estadual do Centro-Oeste (UNICENTRO), 85040-167, Guarapuava, PR - Brazil.

<sup>2</sup> Departamento de Química, Universidade Federal de Santa Catarina (UFSC), 88040-970, Florianópolis, SC - Brazil.

<sup>3</sup> Programa de Pós-Graduação em Ciências da Saúde, Universidade Federal de Ciências da Saúde de Porto Alegre (UFCSPA), 90050-170, Porto Alegre, RS - Brazil.

<sup>4</sup> Instituto de Química - IQ, Universidade Federal de Goiás – (UFG), 74690-900, Goiânia - GO – Brazil.

<sup>5</sup> Department of Chemistry and Industrial Chemistry, University of Pisa, Via G. Moruzzi 13, I-56124, Pisa – Italy;

<sup>6</sup> Instituto de Química - INQUI, Universidade Federal do Mato Grosso do Sul (UFMS), 79074-460, Campo Grande, MS - Brazil.

<sup>7</sup> Department of Chemical Sciences, Faculty of Science, University of Johannesburg, Doornfontein, 2028, South Africa.

\* Correspondence: [giancarlo@unicentro.br](mailto:giancarlo@unicentro.br) (G.V.B.); [jamal.chm@gmail.com](mailto:jamal.chm@gmail.com) and [jamal.rafique@ufms.br](mailto:jamal.rafique@ufms.br) (J.R.); [braga.antonio@ufsc.br](mailto:braga.antonio@ufsc.br) (A.L.B.)

## Table of contents:

### Materials and Methods

#### General procedure for the synthesis of *bis-o*-nitrobenzene diselenides (2a-e)

#### General procedure for the synthesis of aniline-derived diselenides (3a-e)

**Figure S1.** <sup>1</sup>H NMR (200 MHz, CDCl<sub>3</sub>) Spectrum of compound **2a**.

**Figure S2.** <sup>13</sup>C NMR (50 MHz, CDCl<sub>3</sub>) Spectrum of compound **2a**.

**Figure S3.** HRMS spectrum of compound **2a**.

**Figure S4.** <sup>1</sup>H NMR (200 MHz, CDCl<sub>3</sub>) Spectrum of compound **2b**.

**Figure S5.** <sup>13</sup>C NMR (50 MHz, CDCl<sub>3</sub>) Spectrum of compound **2b**.

**Figure S6.** HRMS spectrum of compound **2b**.

**Figure S7.** <sup>1</sup>H NMR (200 MHz, CDCl<sub>3</sub>) Spectrum of compound **2c**.

**Figure S8.** <sup>13</sup>C NMR (50 MHz, CDCl<sub>3</sub>) Spectrum of compound **2c**.

**Figure S9.** HRMS spectrum of compound **2c**.

**Figure S10.** <sup>1</sup>H NMR (200 MHz, CDCl<sub>3</sub>) Spectrum of compound **2d**.

**Figure S11.** <sup>13</sup>C NMR (50 MHz, CDCl<sub>3</sub>) Spectrum of compound **2d**.

**Figure S12.** HRMS spectrum of compound **2d**.

**Figure S13.** <sup>1</sup>H NMR (200 MHz, CDCl<sub>3</sub>) Spectrum of compound **2e**.

**Figure S14.** <sup>13</sup>C NMR (50 MHz, CDCl<sub>3</sub>) Spectrum of compound **2e**.

**Figure S15.** ESI-MS spectrum of compound **2e**.

**Figure S16.** <sup>1</sup>H NMR (200 MHz, CDCl<sub>3</sub>) Spectrum of compound **3a**.

**Figure S17.** <sup>13</sup>C NMR (50 MHz, CDCl<sub>3</sub>) Spectrum of compound **3a**.

**Figure S18.** <sup>1</sup>H NMR (200 MHz, CDCl<sub>3</sub>) Spectrum of compound **3b**.

**Figure S19.** <sup>13</sup>C NMR (50 MHz, CDCl<sub>3</sub>) Spectrum of compound **3b**.

**Figure S20.** HRMS spectrum of compound **3b**.

**Figure S21.** <sup>1</sup>H NMR (200 MHz, CDCl<sub>3</sub>) Spectrum of compound **3c**.

**Figure S22.** <sup>13</sup>C NMR (50 MHz, CDCl<sub>3</sub>) Spectrum of compound **3c**.

**Figure S23.** HRMS spectrum of compound **3c**.

**Figure S24.** <sup>1</sup>H NMR (200 MHz, CDCl<sub>3</sub>) Spectrum of compound **3d**.

**Figure S25.** <sup>13</sup>C NMR (50 MHz, CDCl<sub>3</sub>) Spectrum of compound **3d**.

**Figure S26.** HRMS spectrum of compound **3d**.

**Figure S27.**  $^1\text{H}$  NMR (200 MHz,  $\text{CDCl}_3$ ) Spectrum of compound **3e**.

**Figure S28.**  $^{13}\text{C}$  NMR (50 MHz,  $\text{CDCl}_3$ ) Spectrum of compound **3e**.

**Figure S29.** ESI-MS spectrum of compound **3e**.

**Figure S30.**  $^{77}\text{Se}$  NMR (76 MHz,  $\text{CDCl}_3$ ) Spectrum of compound **3b**.

**Figure S31.** Absorbance plotted against diphenyl disulfide concentration. The red line represents the linear fit. The coefficient of molar absorptivity in 305 nm was  $1415 \text{ L mol}^{-1} \text{ cm}^{-1}$  ( $R^2 = 0.9996$ ).

**Figure S32.** Initial rate ( $V_0$ ) plotted against substrate concentration. The initial rates were calculated from at least two experiments for each concentration of PhSH. The concentrations of ebselen and  $\text{H}_2\text{O}_2$  were fixed at  $5 \times 10^{-5}$  and  $15 \times 10^{-3} \text{ mol L}^{-1}$ , respectively. The red line represents the Michaelis-Menten fit.

**Figure S33.** Initial rate ( $V_0$ ) plotted against substrate concentration. The initial rates were calculated from at least two experiments for each concentration of PhSH. The concentrations of diphenyl disulfide and  $\text{H}_2\text{O}_2$  were fixed at  $5 \times 10^{-5}$  and  $15 \times 10^{-3} \text{ mol L}^{-1}$ , respectively. The red line represents the Michaelis-Menten fit.

**Figure S34.** Initial rate ( $V_0$ ) plotted against substrate concentration. The initial rates were calculated from at least two experiments for each concentration of PhSH. The concentrations of **3c** and  $\text{H}_2\text{O}_2$  were fixed at  $5 \times 10^{-5}$  and  $15 \times 10^{-3} \text{ mol L}^{-1}$ , respectively. The red line represents the Michaelis-Menten fit.

**Figure S35.** Initial rate ( $V_0$ ) plotted against substrate concentration. The initial rates were calculated from at least two experiments for each concentration of PhSH. The concentrations of **3a** and  $\text{H}_2\text{O}_2$  were fixed at  $5 \times 10^{-5}$  and  $15 \times 10^{-3} \text{ mol L}^{-1}$ , respectively. The red line represents the Michaelis-Menten fit.

**Figure S36.** Initial rate ( $V_0$ ) plotted against substrate concentration. The initial rates were calculated from at least two experiments for each concentration of PhSH. The concentrations of **3b** and  $\text{H}_2\text{O}_2$  were fixed at  $5 \times 10^{-5}$  and  $15 \times 10^{-3} \text{ mol L}^{-1}$ , respectively. The red line represents the Michaelis-Menten fit.

**Figure S37.** Initial rate ( $V_0$ ) plotted against substrate concentration. The initial rates were calculated from at least two experiments for each concentration of PhSH. The concentrations of **3d** and  $\text{H}_2\text{O}_2$  were fixed at  $5 \times 10^{-5}$  and  $15 \times 10^{-3} \text{ mol L}^{-1}$ , respectively. The red line represents the Michaelis-Menten fit.

**Figure S38.** Initial rate ( $V_0$ ) plotted against substrate concentration. The initial rates were calculated from at least two experiments for each concentration of PhSH. The concentrations of **3e** and  $\text{H}_2\text{O}_2$  were fixed at  $5 \times 10^{-5}$  and  $15 \times 10^{-3} \text{ mol L}^{-1}$ , respectively. The red line represents the Michaelis-Menten fit.

**Table S1.** Atomic charges of nitrogen and selenium according to NPA.

**Table S2.** Donor-acceptor second order perturbation analysis.

**Table S3.** DFT-computed energies for optimized geometries (in kcal/mol).

## Materials and Methods

### Experimental

Unless specified otherwise, all starting materials, reagents and solvents were commercially available. All reactions were monitored by thin-layer chromatography on silica gel plates (GF-254) and visualized with UV light, iodine tub or stained with vanillin. All the melting points were measured on a MQ APF-301. <sup>1</sup>H-NMR and <sup>13</sup>C-NMR spectra were recorded on a Bruker Avance 200 NMR spectrometer with tetramethylsilane (TMS) as an internal reference. All chemical shifts are reported in parts per million (ppm). The kinetics of the reactions was determined on a Varian UV-visible system Spectrophotometer Carey Bio 50, equipped with a temperature control bath. High-resolution exact mass measurements were performed using Atmospheric-pressure chemical ionization (APCI), positive mode on a mass spectrometer Bruker Daltonics microTOF-Q II and Electrospray ionization (ESI), positive mode on a quadrupole time-of-flight Agilent QTOF-MS spectrometer. Low resolution mass spectra were obtained from a Shimadzu GCMS-QP5050A apparatus equipped with a DBM-5 capillary column (30 m) using electron ionization voltage of 70 eV.

### General procedure for the synthesis of *bis-o*-nitrobenzene diselenides (**2a-e**)

To a round-bottomed flask, provided with magnetic stirring bar, the nucleophilic selenium species (K<sub>2</sub>Se<sub>2</sub>) was prepared *in situ* by heating (with a thermal blower) of a mixture of elemental selenium (100 mesh, 237.0 mg, 3.0 mmol) and KOH (336.0 mg, 6.0 mmol) until melted for just 5 min in the absence of an inert atmosphere. The dark red mixture formed was then cooled to room temperature and diluted in water (6.0 mL). Next the *o*-halonitrobenzene **1a-f** (1.5 mmol) and THF or DMF (1.5 mL) were added and stirred for 2 h. The product was extracted with ethyl acetate (3 x 30.0 mL) and organic phase was dried with Na<sub>2</sub>SO<sub>4</sub>, filtered and the solvent was completely removed under vacuum to give the crude product. The compounds were purified by flash chromatography over silica gel using ethyl acetate/hexane as the eluent.

### General procedure for the synthesis of aniline-derived diselenides (**3a-e**)

To the reduction of *bis-o*-nitrobenzene diselenides **2a-e** (1.5 mmol), these were mixed with methanol (25.0 mL), FeSO<sub>4</sub>·7H<sub>2</sub>O (6.5 mmol, 1.8 g) and H<sub>2</sub>O (25.0 mL) into a two-necked round-bottomed flask (100 mL) equipped with a reflux condenser. The reaction mixture was refluxed for 1.5 h, and then NH<sub>4</sub>OH (15.0 mL) was added and stirred for more 10 min under reflux. After this time, the solution was cooled to room temperature, diluted with ethyl acetate (60.0 mL) and washed with H<sub>2</sub>O (3 x 25.0 mL). The organic phase was separated, dried over Na<sub>2</sub>SO<sub>4</sub> and concentrated under vacuum. The residue was purified by flash chromatography on silica gel using ethyl acetate/hexane as the eluent, obtaining the desired *bis*-aniline-derived diselenides **3a-e** in good yields.

## Spectral Data

### Bis(2-nitrophenyl) diselenide (2a)<sup>1</sup>:

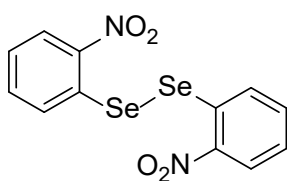

Purification by column chromatography, eluent: hexane/ethyl acetate 90:10, 50% yield (301 mg); light yellow solid, m.p.: 208-209 °C; <sup>1</sup>H NMR (CDCl<sub>3</sub>, 200 MHz): δ = 8.36 (dd, *J*<sup>1</sup> = 7.8 Hz, *J*<sup>2</sup> = 1.5 Hz, 2H); 7.91 (dd, *J*<sup>1</sup> = 7.8 Hz, *J*<sup>2</sup> = 1.5 Hz, 2H); 7.56-7.39 (m, 4H); <sup>13</sup>C NMR (CDCl<sub>3</sub>, 50 MHz): δ = 146.8, 134.9, 131.8, 128.9, 127.8, 126.5; HRMS *m/z*: calc. C<sub>12</sub>H<sub>8</sub>O<sub>4</sub>N<sub>2</sub>Se<sub>2</sub> [M]: 403.8812; found: 403.8815; TLC (hexane/ethyl acetate 90:10): R<sub>f</sub> = 0.25.

### Bis(2-nitro-4-trifluoromethylphenyl) diselenide (2b)<sup>2</sup>:

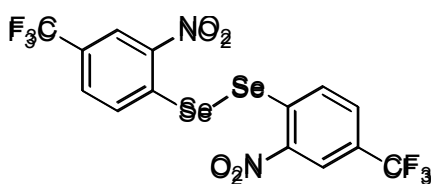

Purification by column chromatography, eluent: hexane/ethyl acetate 98:2, 83% yield for method A (671 mg) and 30 % yield for method B (81 mg), yellow solid. m.p.: 175-178 °C; <sup>1</sup>H NMR (CDCl<sub>3</sub>, 200 MHz): δ = 8.65 (d, *J* = 1.8 Hz, 2H); 8.06 (d, *J* = 8.6 Hz, 2H); 7.74 (dd, *J*<sup>1</sup> = 8.6 Hz, *J*<sup>2</sup> = 1.8 Hz, 2H); <sup>13</sup>C NMR (CDCl<sub>3</sub>, 50 MHz): δ = 146.5, 133.0, 132.6, 130.9 (qua, *J* = 34.4 Hz); 130.8 (qua, *J* = 3.3 Hz); 123.6 (qua, *J* = 3.8 Hz); 122.6 (qua, *J* = 271.0 Hz); HRMS *m/z*: calc. C<sub>14</sub>H<sub>6</sub>O<sub>4</sub>N<sub>2</sub>Se<sub>2</sub>F<sub>6</sub> [M]: 539.8560; found: 539.8543; TLC (hexane): R<sub>f</sub> = 0.3.

### Bis(4-methoxy-2-nitrophenyl) diselenide (2c):

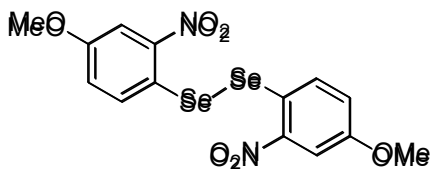

Purification by column chromatography, eluent: hexane/ethyl acetate 90:10, 15 % yield (104 mg), yellow solid, m.p.: 178-179 °C; <sup>1</sup>H NMR (CDCl<sub>3</sub>, 200 MHz): δ = 7.84 (d, *J* = 2.8 Hz, 2H); 7.75 (d, *J* = 8.8 Hz, 2H); 7.09 (dd, *J*<sup>1</sup> = 8.8 Hz, *J*<sup>2</sup> = 2.8 Hz, 2H); 3.88 (s, 6H); <sup>13</sup>C NMR (CDCl<sub>3</sub>, 50 MHz): δ = 159.4, 146.9, 132.4, 122.7, 119.0, 109.8, 56.0; HRMS *m/z*: calc. C<sub>14</sub>H<sub>12</sub>O<sub>6</sub>N<sub>2</sub>Se<sub>2</sub> [M]: 463.9023; found: 463.9025; TLC (hexane/ethyl acetate 80:20): R<sub>f</sub> = 0.4.

### Bis(4-bromo-2-nitrophenyl) diselenide (2d):

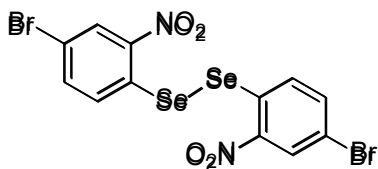

Purification by column chromatography, eluent: hexane/ethyl acetate 98:2, 54 % yield for method A (453 mg) and 90 % yield for method B (252 mg), orange solid, m.p.: 92-94 °C; <sup>1</sup>H NMR (CDCl<sub>3</sub>, 200 MHz): δ = 8.49 (s, 2H); 7.75-7.57 (m, 4H); <sup>13</sup>C NMR (CDCl<sub>3</sub>, 50 MHz): δ = 147.1, 137.9, 133.1, 129.3, 127.5, 121.4; HRMS *m/z*: calc. C<sub>12</sub>H<sub>6</sub>O<sub>4</sub>N<sub>2</sub>Se<sub>2</sub>Br<sub>2</sub> [M]: 559.7006; found: 559.7017; TLC (hexane/ethyl acetate 90:10): R<sub>f</sub> = 0.46.

### Bis(4-chloro-2-nitrophenyl) diselenide (2e):

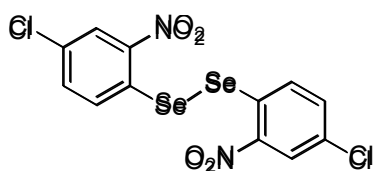

Purification by column chromatography, eluent: hexane/ethyl acetate 95:5, 52 % yield for method A (367 mg) and 81 % yield for method B (172 mg), orange solid;  $^1\text{H}$  NMR ( $\text{CDCl}_3$ , 200 MHz):  $\delta$  = 8.08 (d,  $J$  = 2.2 Hz, 2H); 7.52 (d,  $J$  = 8.6 Hz, 2H); 7.18 (dd,  $J^1$  = 8.6 Hz,  $J^2$  = 2.2 Hz, 2H);  $^{13}\text{C}$  NMR ( $\text{CDCl}_3$ , 50 MHz):  $\delta$  = 146.8, 134.8, 134.1, 132.7, 126.6, 126.2; ESI-MS  $m/z$ : 235.9; TLC (hexane/ethyl acetate 95:5):  $R_f$  = 0.5.

### Bis(2-aminophenyl) diselenide (3a)<sup>1b,3</sup>:

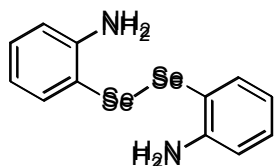

Purification by column chromatography, eluent: hexane/ethyl acetate 50:50, 84 % yield (431 mg), dark yellow solid, m.p.: 82-84 °C;  $^1\text{H}$  NMR ( $\text{CDCl}_3$ , 200 MHz):  $\delta$  = 7.35 (dd,  $J^1$  = 7.8 Hz,  $J^2$  = 1.4 Hz, 2H); 7.18-7.09 (m, 2H); 6.73-6.51 (m, 4H); 4.28 (br, 4H);  $^{13}\text{C}$  NMR ( $\text{CDCl}_3$ , 50 MHz):  $\delta$  = 149.0, 138.4, 137.5, 131.6, 118.5, 114.9; GC/MS:  $m/z$ (%) 346 (1), 257 (11), 255 (37), 253 (17), 252 (5), 251 (5), 184 (23), 183 (17), 181 (14), 174 (34), 173 (16), 172 (100), 170 (84), 169 (29), 168 (29), 149 (52), 83 (74), 77 (29), 65 (52), 57 (89), 55 (50), 44 (48), 43 (87); TLC (hexane/ethyl acetate 50:50):  $R_f$  = 0.75.

### Bis(2-amino-4-trifluoromethylphenyl) diselenide (3b):

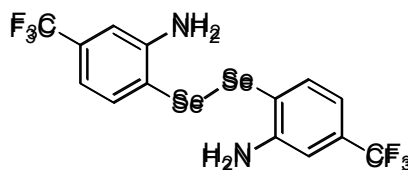

Purification by column chromatography, eluent: hexane/ethyl acetate 90:10, 71 % yield (509 mg), dark yellow solid, m.p.: 90-92 °C;  $^1\text{H}$  NMR ( $\text{CDCl}_3$ , 200 MHz):  $\delta$  = 7.42 (d,  $J$  = 8.1 Hz, 2H); 6.94 (s, 2H); 6.79 (d,  $J$  = 8.1 Hz, 2H); 4.48 (s, 4H);  $^{13}\text{C}$  NMR ( $\text{CDCl}_3$ , 50 MHz):  $\delta$  = 146.9, 138.6, 133.8 (qua,  $J$  = 32.2 Hz); 123.9 (qua,  $J$  = 272.6 Hz); 118.1 (qua,  $J$  = 1.5 Hz); 114.7 (qua,  $J$  = 3.8 Hz); 111.3 (qua,  $J$  = 3.8 Hz);  $^{77}\text{Se}$  NMR (76 MHz,  $\text{CDCl}_3$ ):  $\delta$  = 401.3; HRMS  $m/z$ : calc.  $\text{C}_{14}\text{H}_{10}\text{N}_2\text{Se}_2\text{F}_6$  [M]: 479.9076; found: 479.9079; TLC (hexane/ethyl acetate 80:20):  $R_f$  = 0.4.

### Bis(4-methoxy-2-aminophenyl) diselenide (3c):

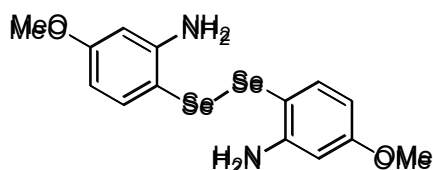

Purification by column chromatography, eluent: hexane/ethyl acetate 85:15, 63% yield (380 mg), dark orange solid;  $^1\text{H}$  NMR ( $\text{CDCl}_3$ , 200 MHz):  $\delta$  = 6.98 (d,  $J$  = 8.8 Hz, 2H); 6.03 (d,  $J$  = 2.8 Hz, 2H); 5.94 (dd,  $J^1$  = 8.8 Hz,  $J^2$  = 2.8 Hz, 2H); 3.79 (bs, 4H); 3.45 (s, 6H);  $^{13}\text{C}$  NMR ( $\text{CDCl}_3$ , 50 MHz):  $\delta$  = 162.9, 150.4, 139.9, 107.0, 105.0, 99.8, 55.3; HRMS  $m/z$ : calc.  $\text{C}_7\text{H}_8\text{ONSe}$ : 201.9766; found: 201.9774; TLC (hexane/ethyl acetate 70:30):  $R_f$  = 0.35.

### Bis(4-bromo-2-aminophenyl) diselenide (3d):

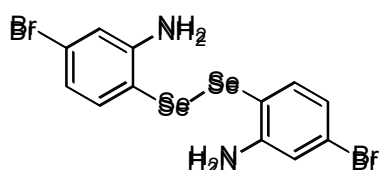

Purification by column chromatography, eluent: hexane/ethyl acetate 98:2, 64% yield (480 mg), orange solid; m.p.: 54-55 °C;  $^1\text{H}$  NMR ( $\text{CDCl}_3$ , 200 MHz):  $\delta$  = 7.25 (d,  $J$  = 8.4 Hz, 2H); 6.91 (d,  $J$  = 2.2 Hz, 2H); 6.76 (dd,  $J^1$  = 8.4 Hz,  $J^2$  = 2.2 Hz, 2H); 4.15 (br, 4H);  $^{13}\text{C}$  NMR ( $\text{CDCl}_3$ ,

50 MHz):  $\delta$  = 145.3, 133.6, 122.1, 121.7, 118.1, 107.7; HRMS  $m/z$ : calc.  $C_{12}H_{10}N_2Se_2Br_2$  [M]: 499.7525; found: 499.7527; TLC (hexane/ethyl acetate 90:10):  $R_f$  = 0.3.

**Bis(4-chloro-2-aminophenyl) diselenide (3e):**

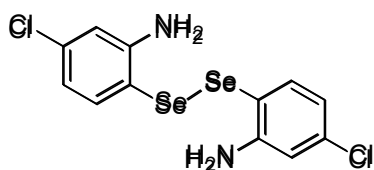

Purification by column chromatography, eluent: hexane/ethyl acetate 98:2, 65% yield (400 mg), orange solid; m.p.: 142-143;  $^1H$  NMR ( $CDCl_3$ , 200 MHz):  $\delta$  = 7.13 (d,  $J$  = 8.4 Hz, 2H); 6.73 (d,  $J$  = 2.2 Hz, 2H); 6.64 (dd,  $J^1$  = 8.1 Hz,  $J^2$  = 2.2 Hz, 2H); 3.98 (br, 4H);  $^{13}C$  NMR ( $CDCl_3$ , 50 MHz):  $\delta$  = 1438.8, 133.1, 130.2, 118.8, 117.4, 115.4; ESI-MS  $m/z$ : 411.1; TLC (hexane/ethyl acetate 90:10):  $R_f$  = 0.25.

## 5. Spectral characterization of synthesized compounds

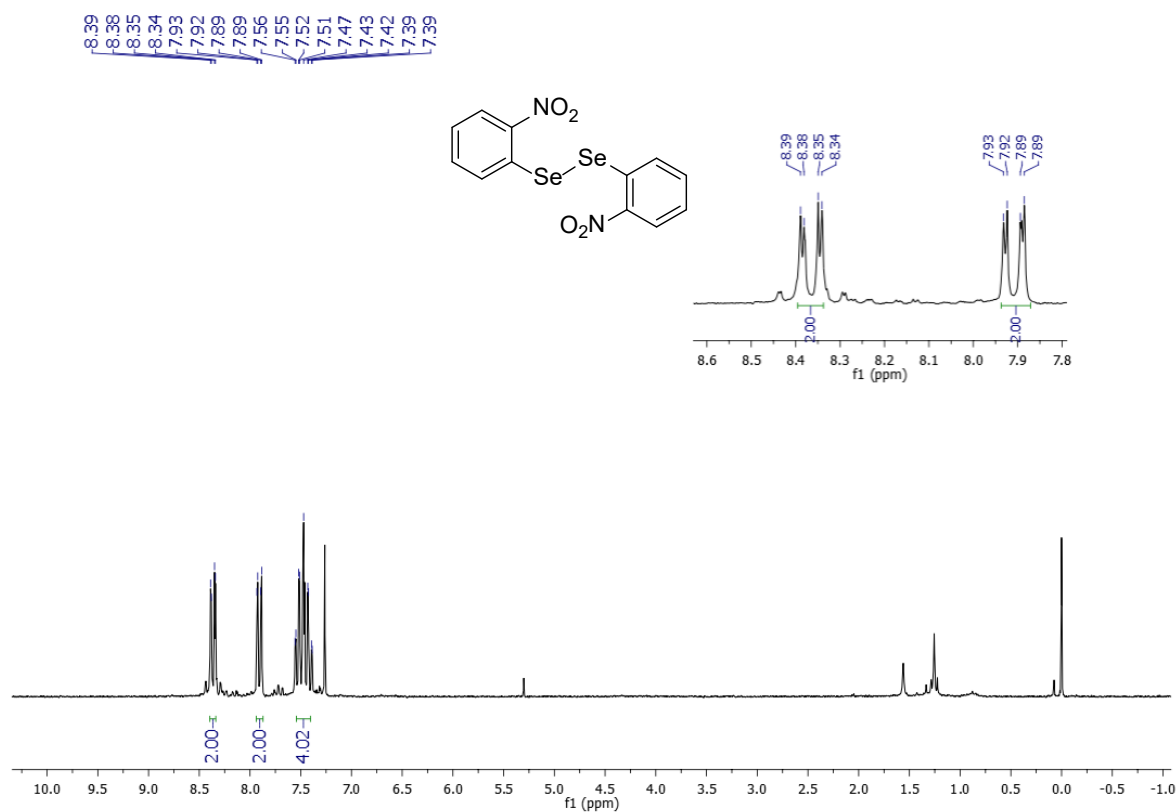

Figure S1. <sup>1</sup>H NMR (200 MHz, CDCl<sub>3</sub>) Spectrum of compound **2a**.

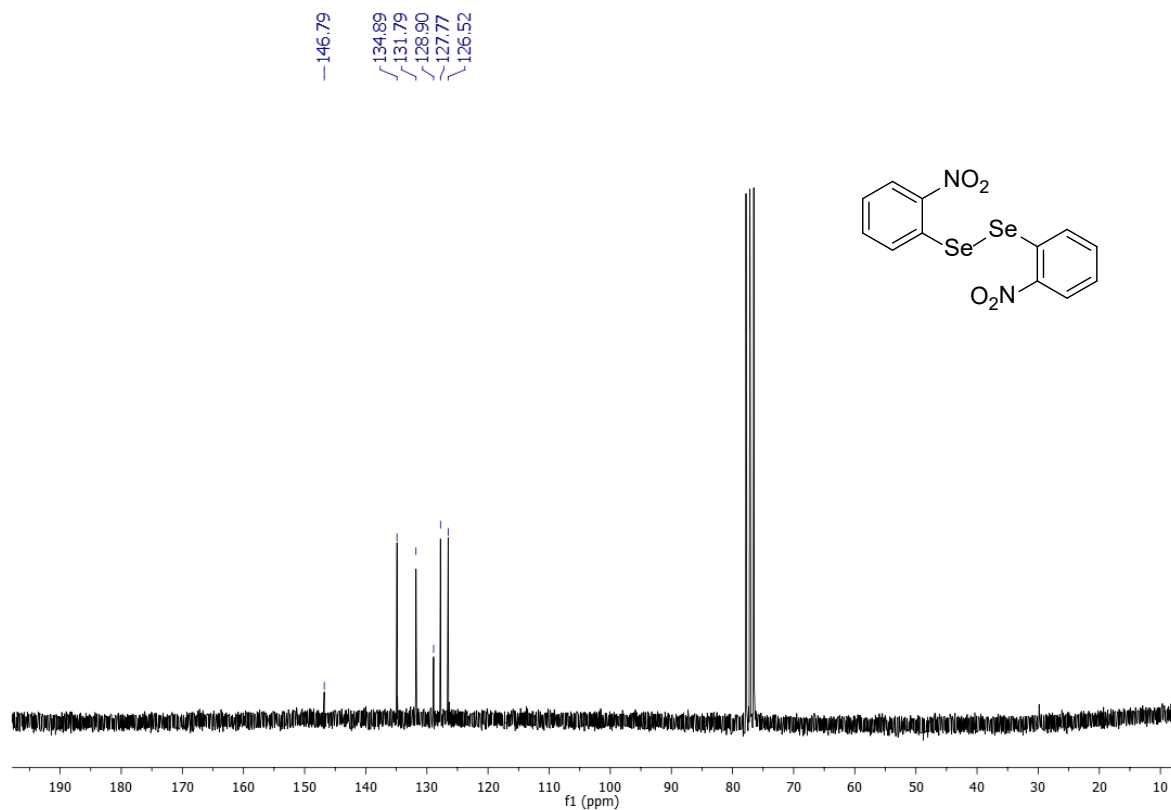

Figure S2. <sup>13</sup>C NMR (50 MHz, CDCl<sub>3</sub>) Spectrum of compound **2a**.

**Acquisition Parameter**

|             |            |                       |           |                  |           |
|-------------|------------|-----------------------|-----------|------------------|-----------|
| Source Type | APCI       | Ion Polarity          | Positive  | Set Nebulizer    | 2.5 Bar   |
| Focus       | Not active | Set Capillary         | 4000 V    | Set Dry Heater   | 250 °C    |
| Scan Begin  | 150 m/z    | Set End Plate Offset  | -500 V    | Set Dry Gas      | 1.5 l/min |
| Scan End    | 1000 m/z   | Set Collision Cell RF | 150.0 Vpp | Set Divert Valve | Source    |

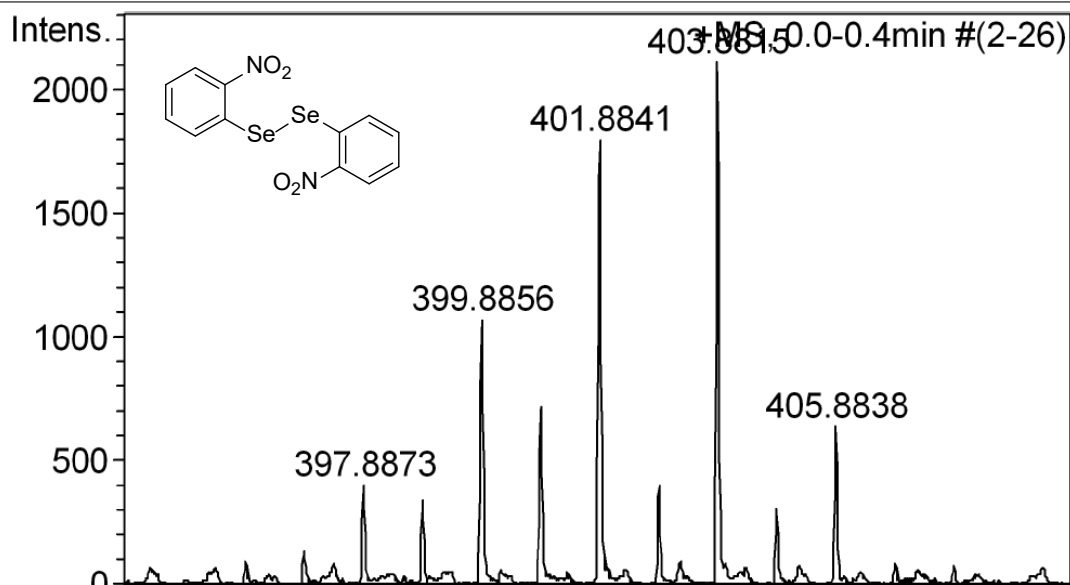

**Figure S3.** HRMS spectrum of compound **2a**.

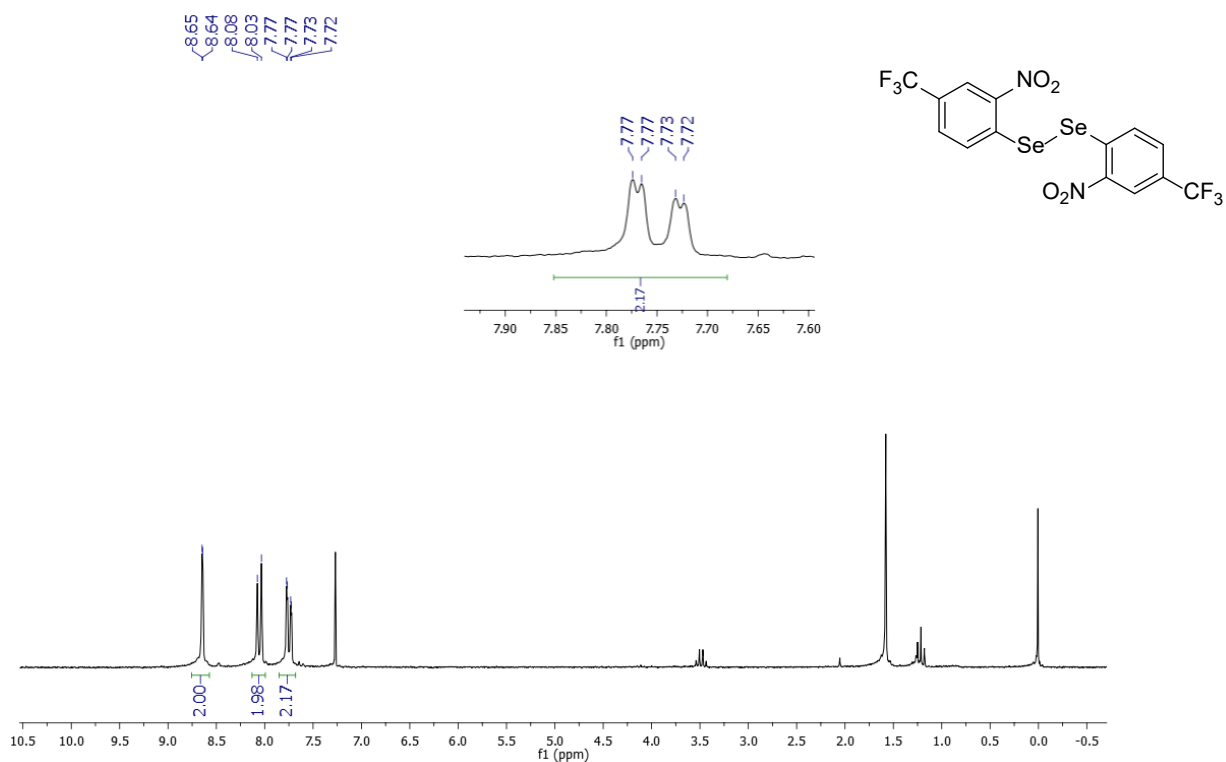

**Figure S4.** <sup>1</sup>H NMR (200 MHz, CDCl<sub>3</sub>) Spectrum of compound **2b**.



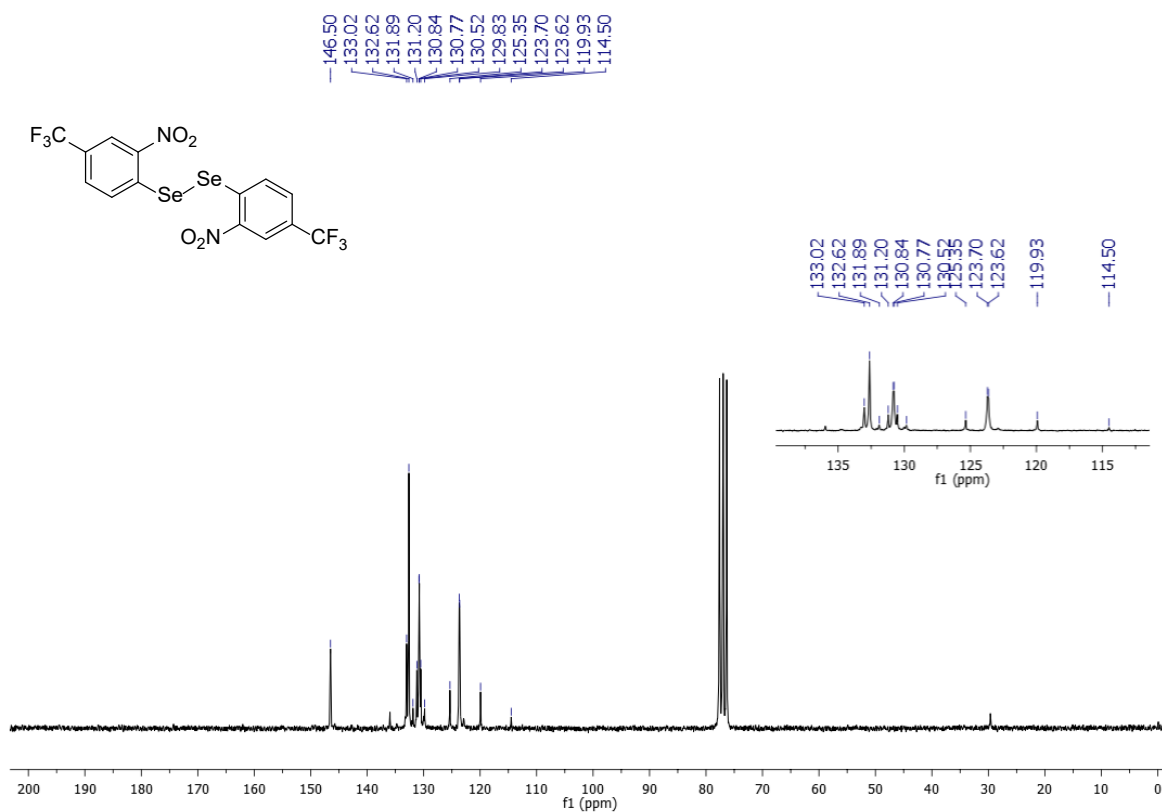

**Figure S5.** <sup>13</sup>C NMR (50 MHz, CDCl<sub>3</sub>) Spectrum of compound **2b**.

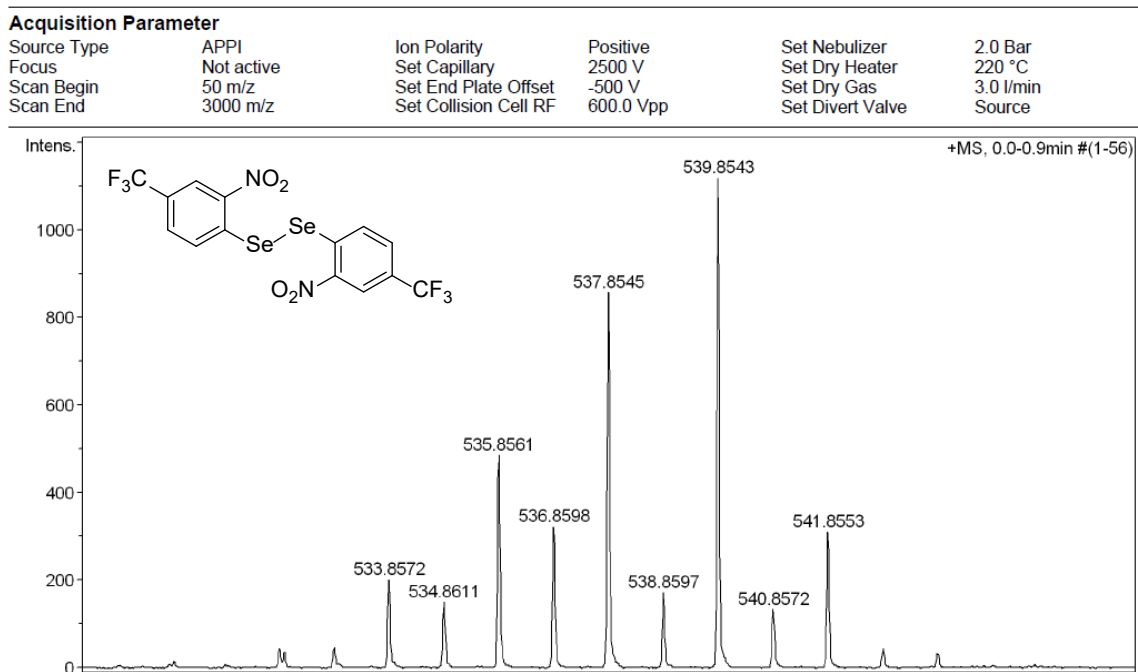

**Figure S6.** HRMS spectrum of compound **2b**.

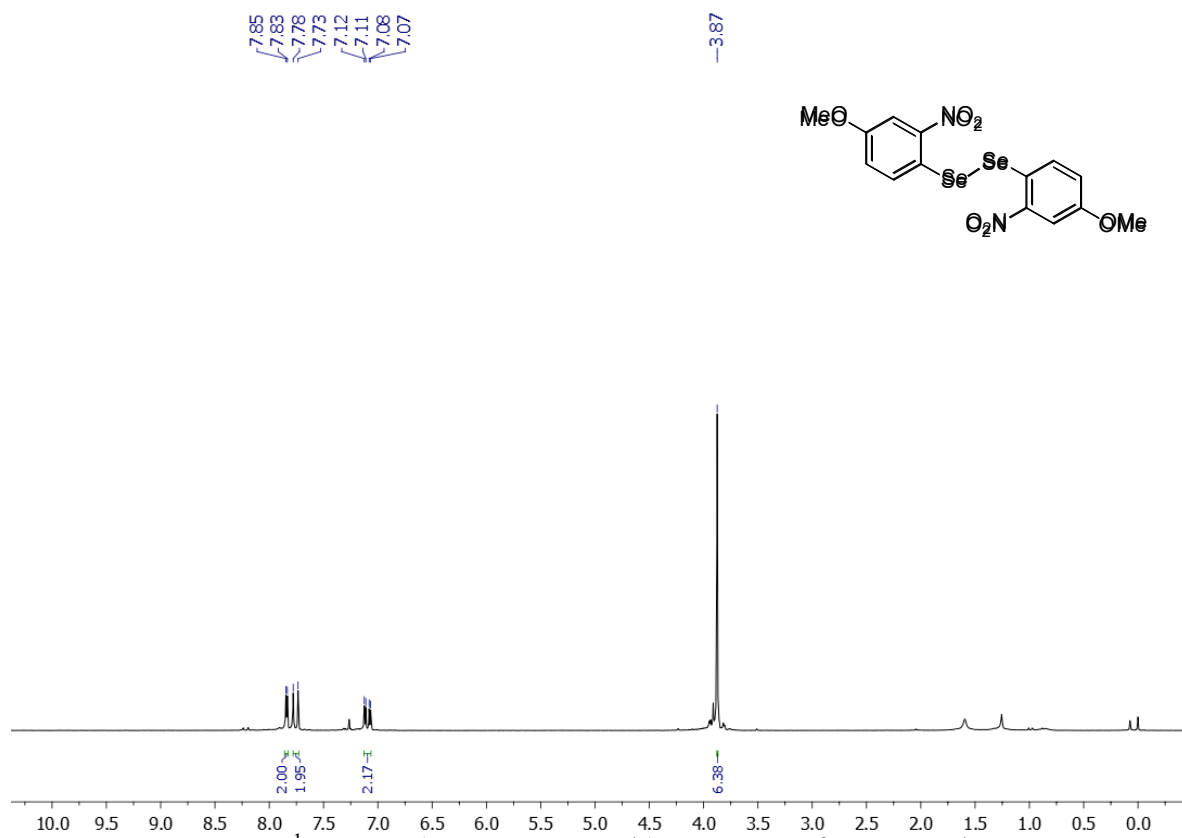

**Figure S7.** <sup>1</sup>H NMR (200 MHz, CDCl<sub>3</sub>) Spectrum of compound **2c**.

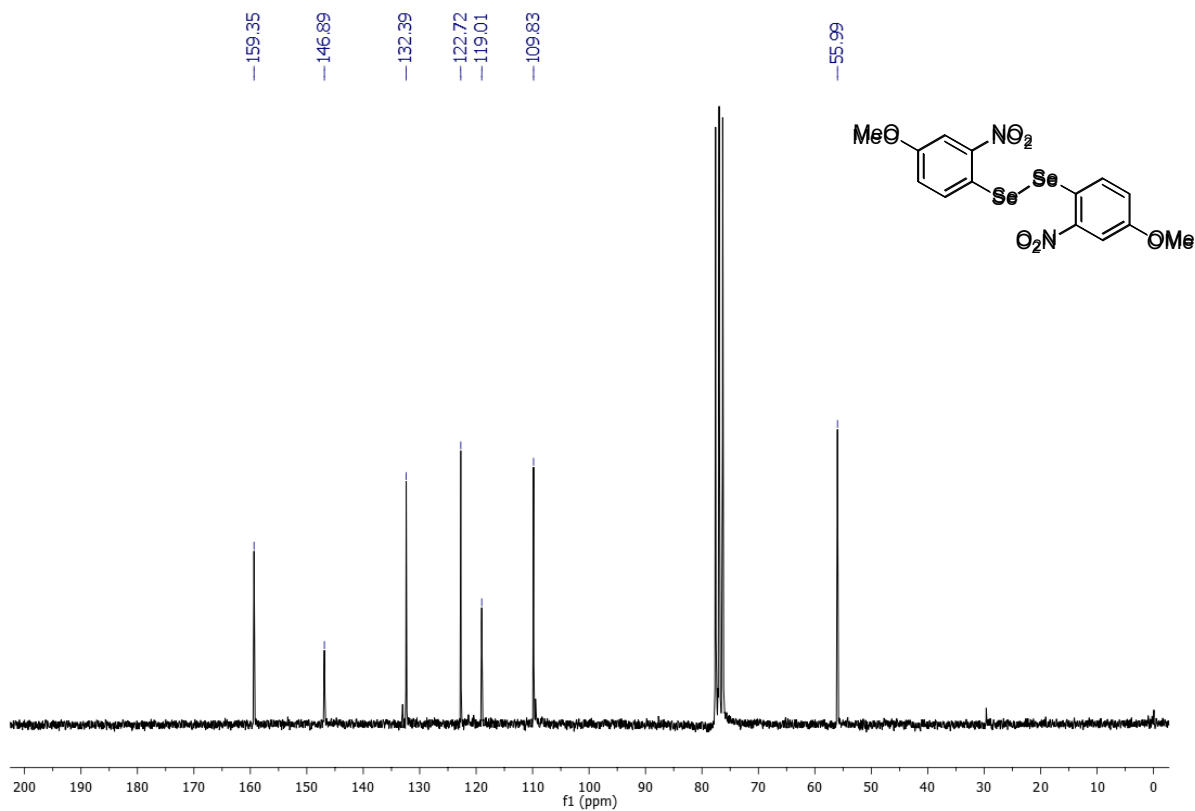

**Figure S8.** <sup>13</sup>C NMR (50 MHz, CDCl<sub>3</sub>) Spectrum of compound **2c**.

**Acquisition Parameter**

|             |            |                       |           |                  |           |
|-------------|------------|-----------------------|-----------|------------------|-----------|
| Source Type | APCI       | Ion Polarity          | Positive  | Set Nebulizer    | 2.5 Bar   |
| Focus       | Not active | Set Capillary         | 4000 V    | Set Dry Heater   | 250 °C    |
| Scan Begin  | 150 m/z    | Set End Plate Offset  | -500 V    | Set Dry Gas      | 1.5 l/min |
| Scan End    | 1000 m/z   | Set Collision Cell RF | 200.0 Vpp | Set Divert Valve | Source    |

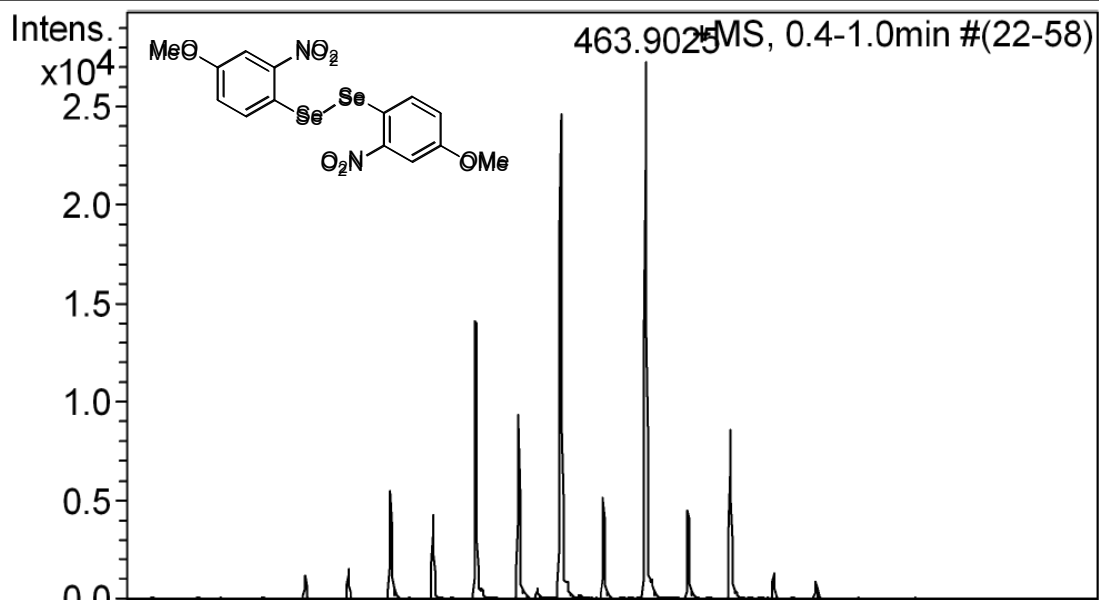

**Figure S9.** HRMS spectrum of compound **2c**.

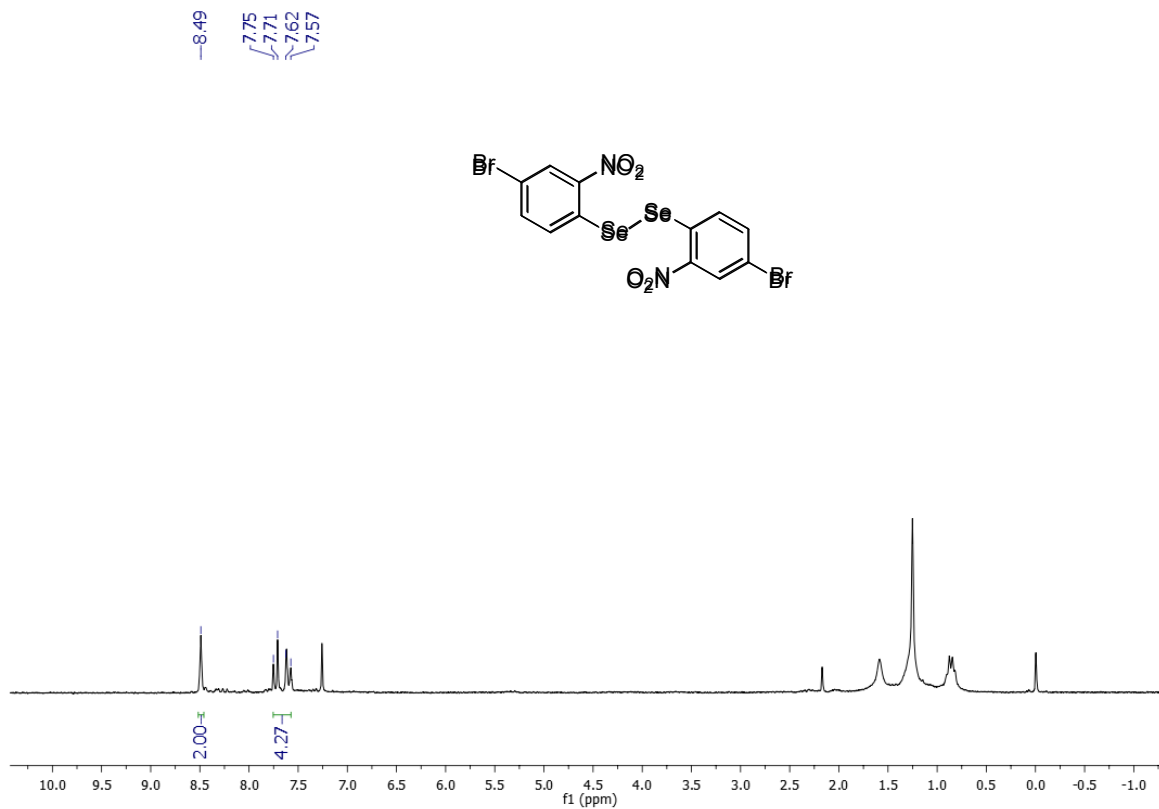

**Figure S10.**  $^1\text{H}$  NMR (200 MHz,  $\text{CDCl}_3$ ) Spectrum of compound **2d**.

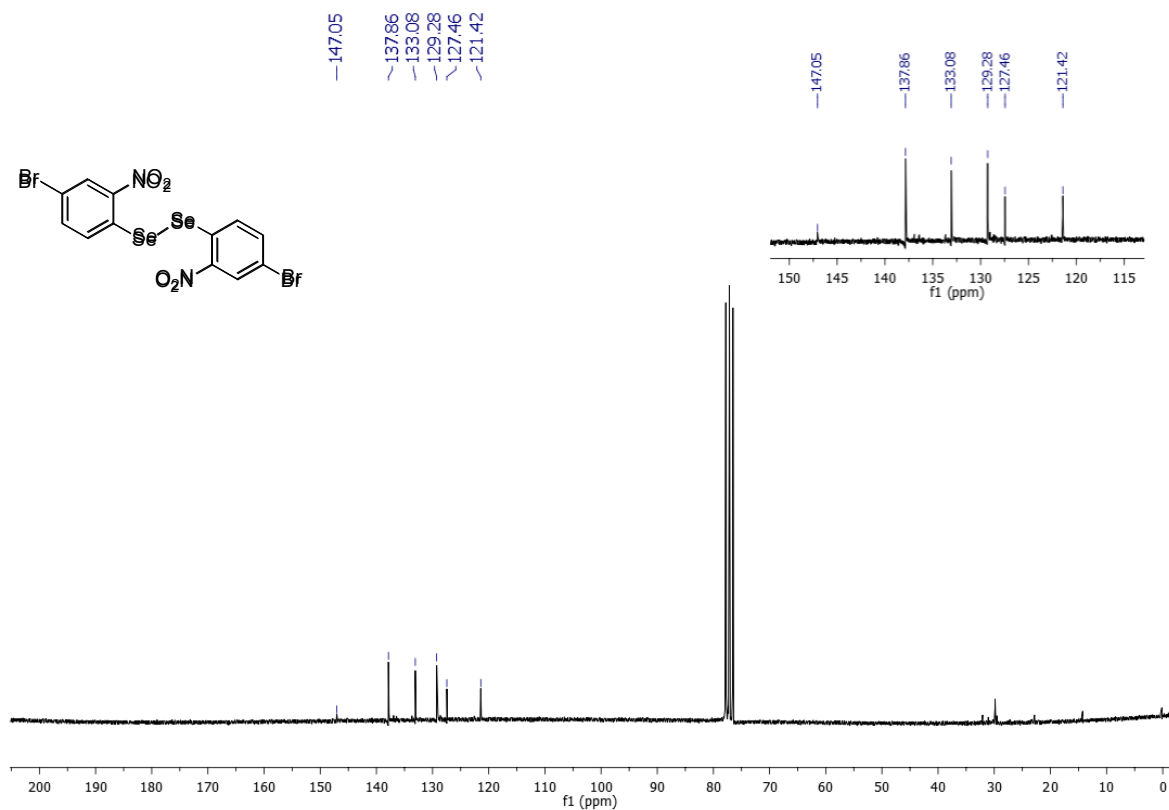

Figure S11. <sup>13</sup>C NMR (50 MHz, CDCl<sub>3</sub>) Spectrum of compound 2d.

#### Acquisition Parameter

|             |          |                       |           |                  |           |
|-------------|----------|-----------------------|-----------|------------------|-----------|
| Source Type | APCI     | Ion Polarity          | Positive  | Set Nebulizer    | 2.5 Bar   |
| Focus       | Active   | Set Capillary         | 4000 V    | Set Dry Heater   | 250 °C    |
| Scan Begin  | 50 m/z   | Set End Plate Offset  | -500 V    | Set Dry Gas      | 1.5 l/min |
| Scan End    | 1000 m/z | Set Collision Cell RF | 400.0 Vpp | Set Divert Valve | Source    |

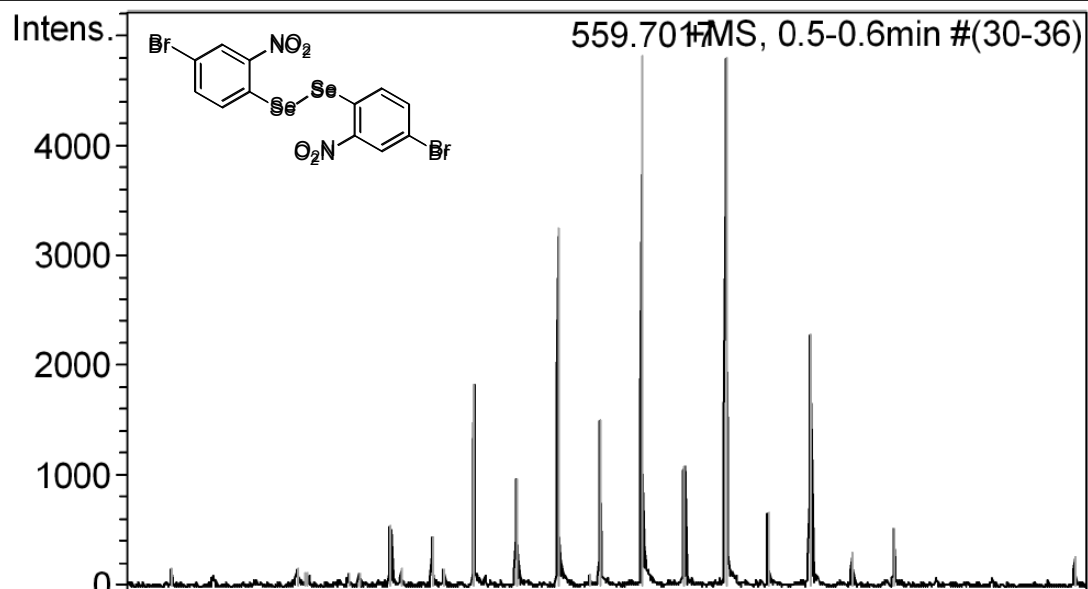

Figure S12. HRMS spectrum of compound 2d.

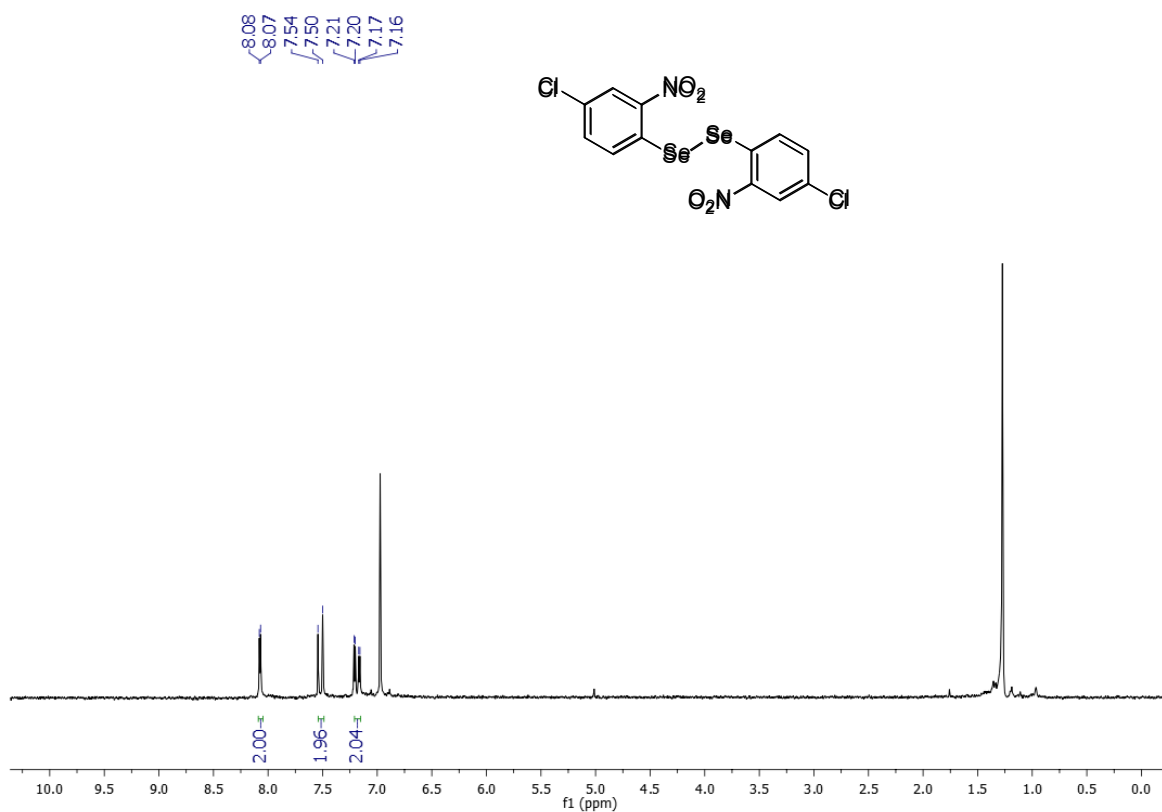

**Figure S13.** <sup>1</sup>H NMR (200 MHz, CDCl<sub>3</sub>) Spectrum of compound **2e**.

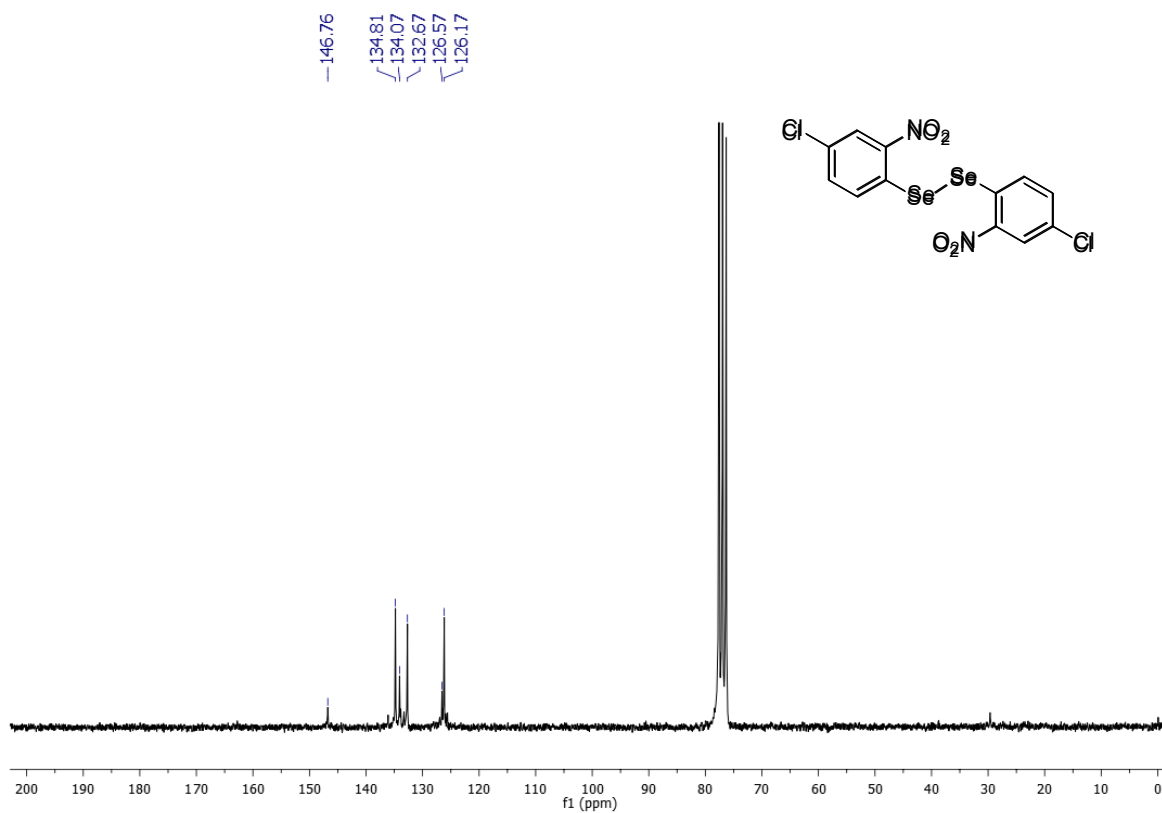

**Figure S14.** <sup>13</sup>C NMR (50 MHz, CDCl<sub>3</sub>) Spectrum of compound **2e**.

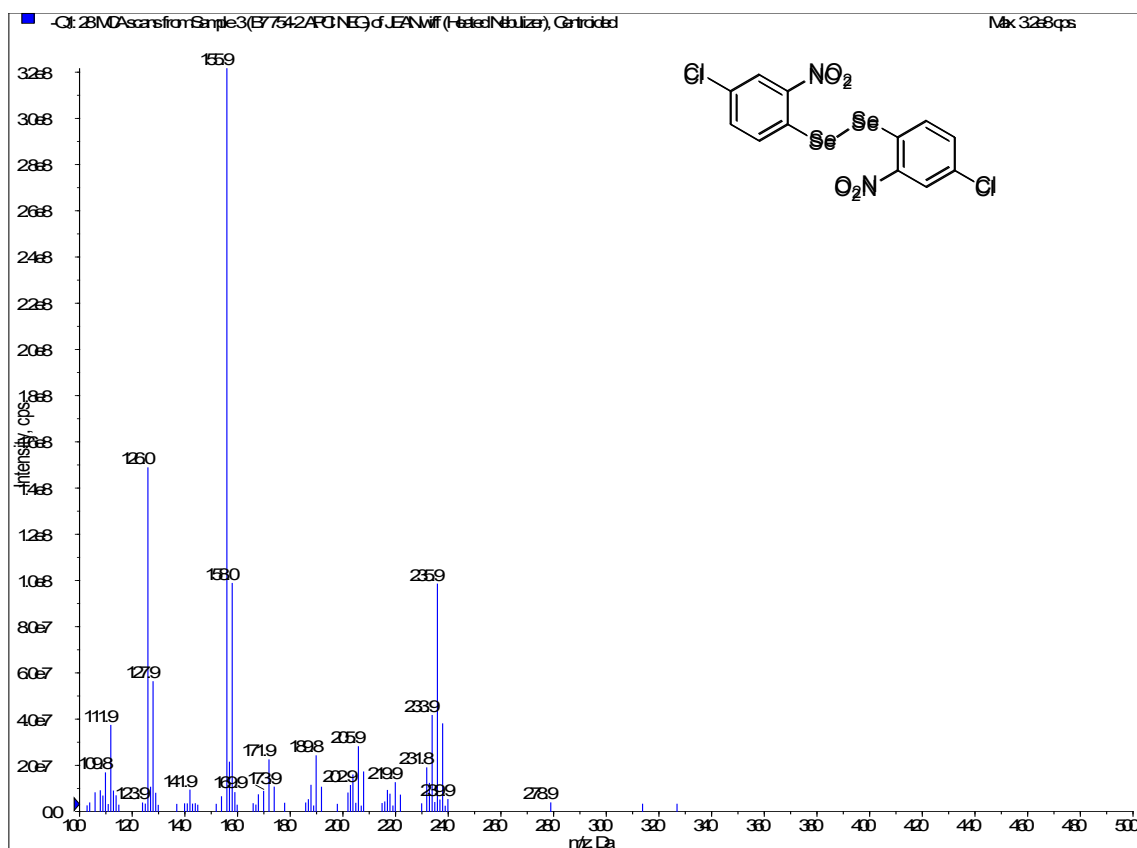

Figure S15. ESI-MS spectrum of compound 2e.

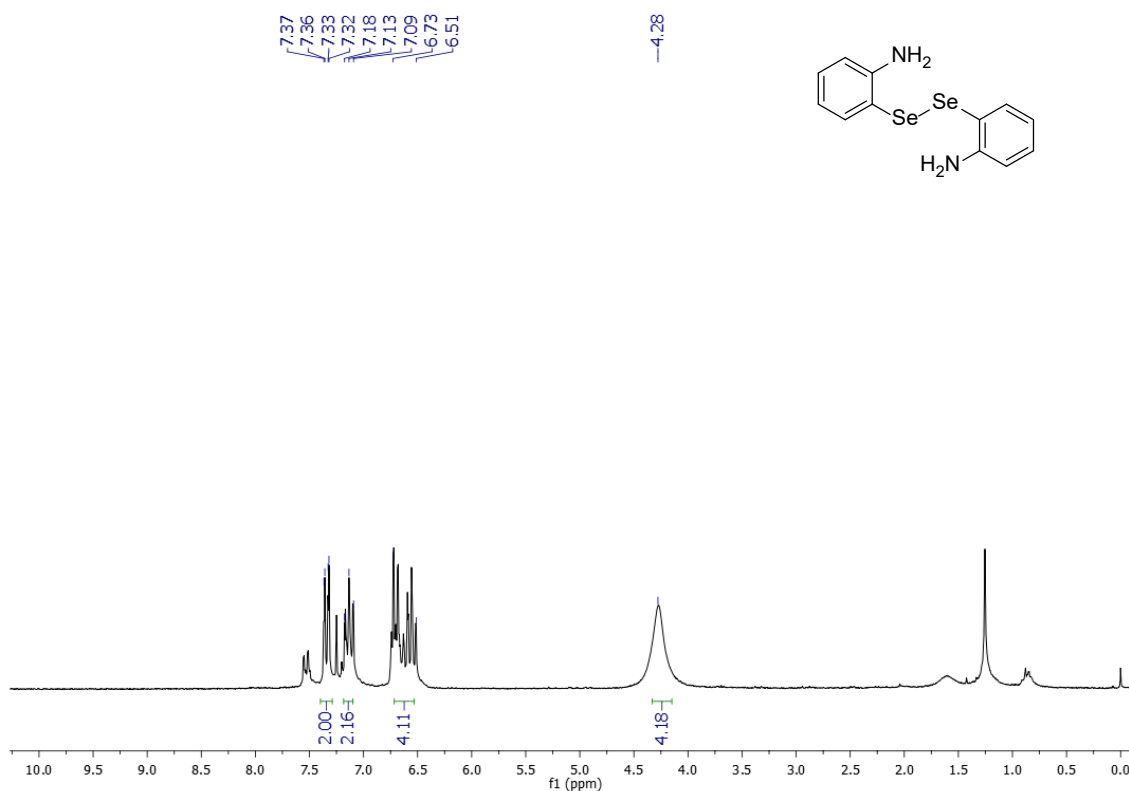

Figure S16.  $^1\text{H}$  NMR (200 MHz,  $\text{CDCl}_3$ ) Spectrum of compound 3a.

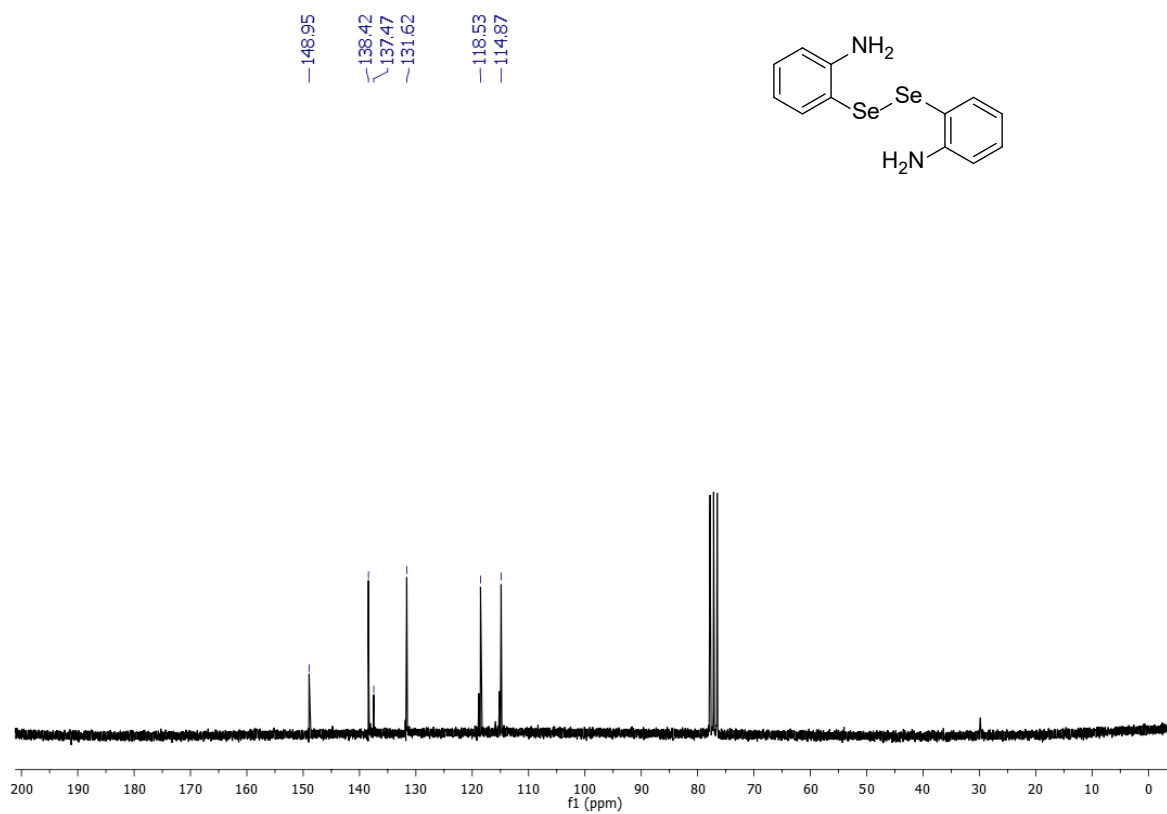

**Figure S17.** <sup>13</sup>C NMR (50 MHz, CDCl<sub>3</sub>) Spectrum of compound **3a**.

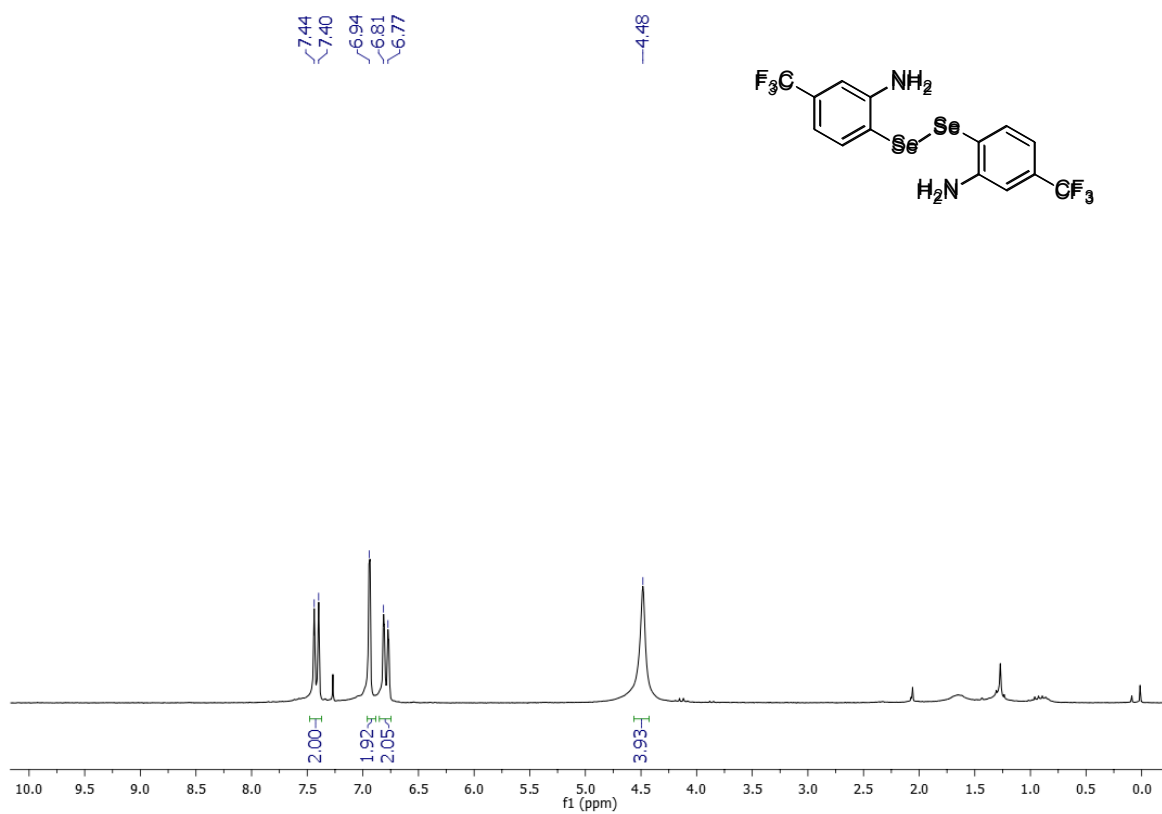

**Figure S18.** <sup>1</sup>H NMR (200 MHz, CDCl<sub>3</sub>) Spectrum of compound **3b**.

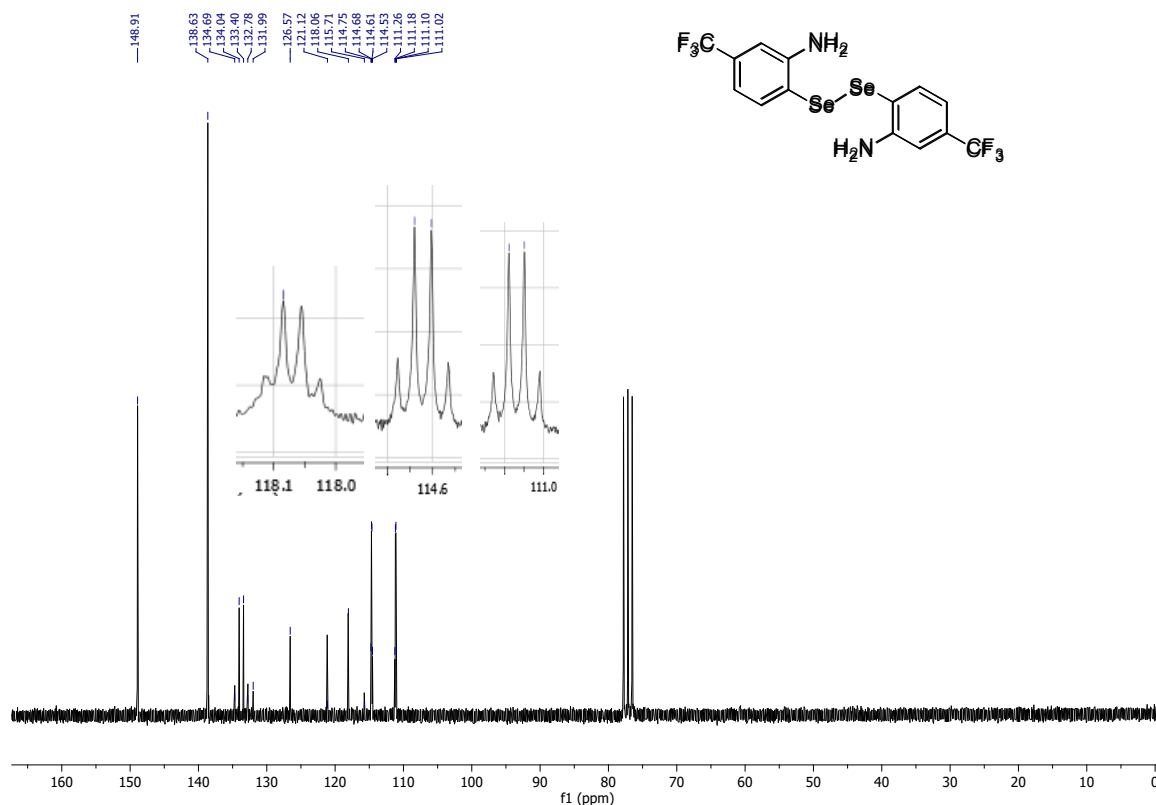

Figure S19. <sup>13</sup>C NMR (50 MHz, CDCl<sub>3</sub>) Spectrum of compound **3b**.

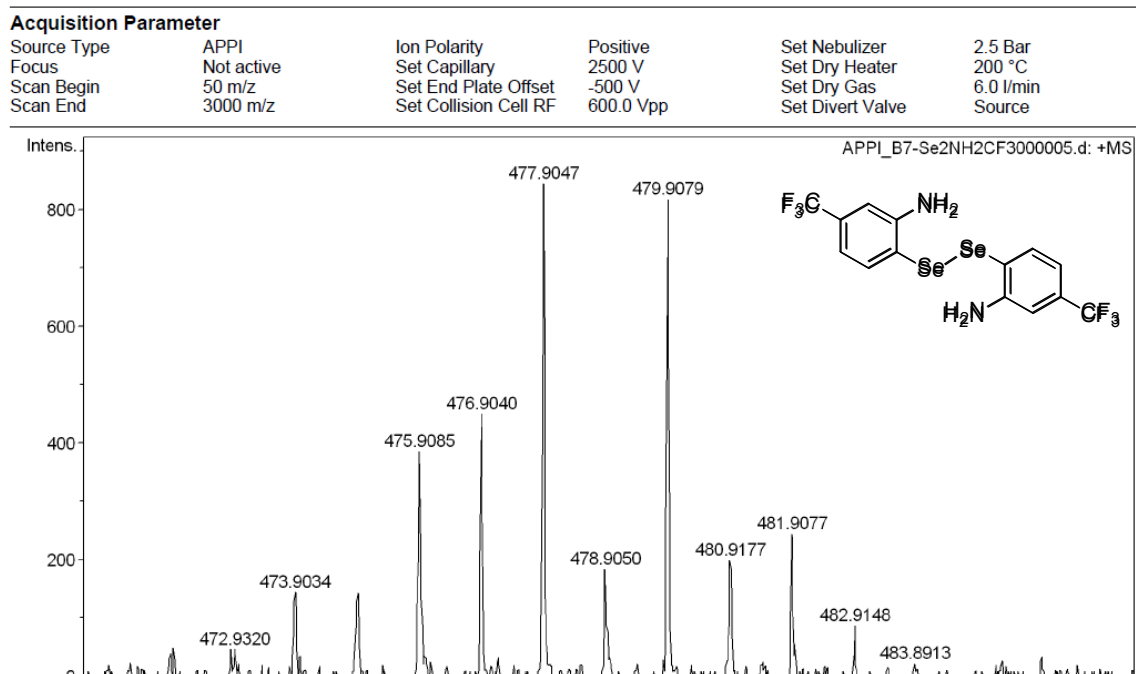

Figure S20. HRMS spectrum of compound **3b**.



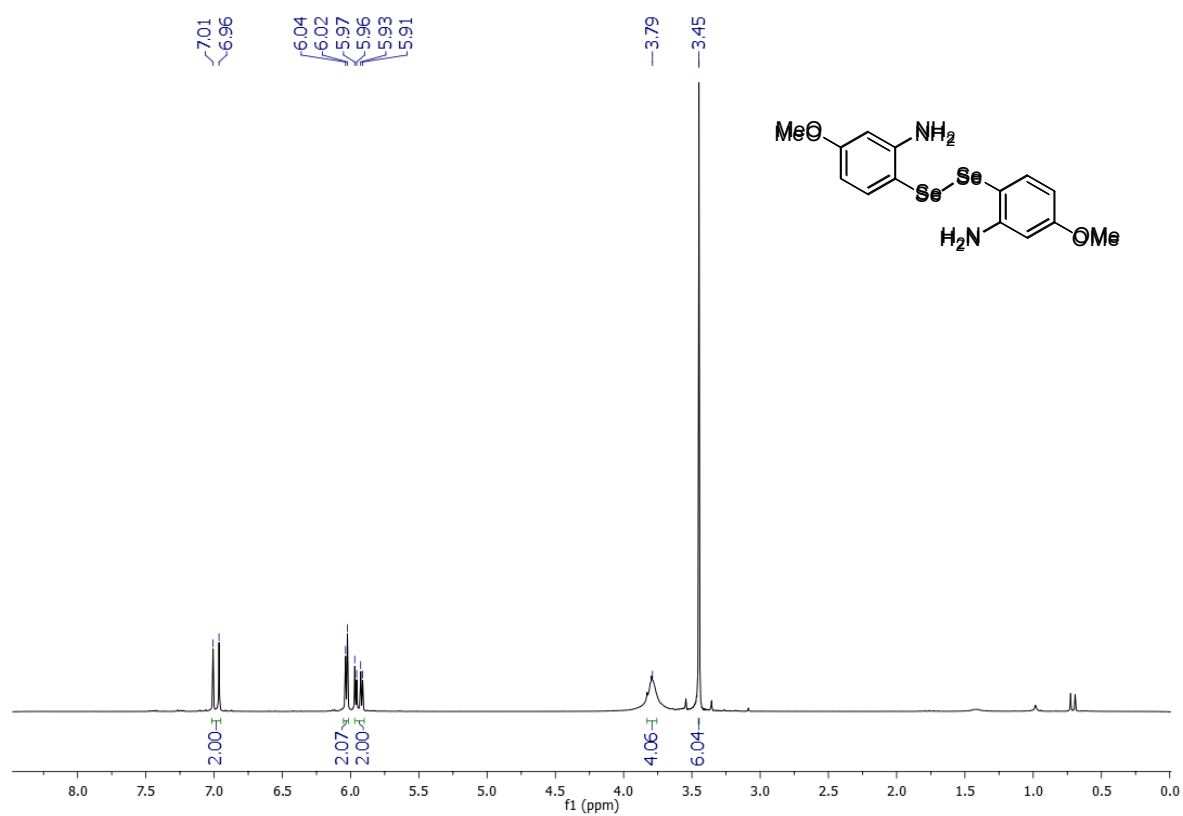

**Figure S21.** <sup>1</sup>H NMR (200 MHz, CDCl<sub>3</sub>) Spectrum of compound **3c**.

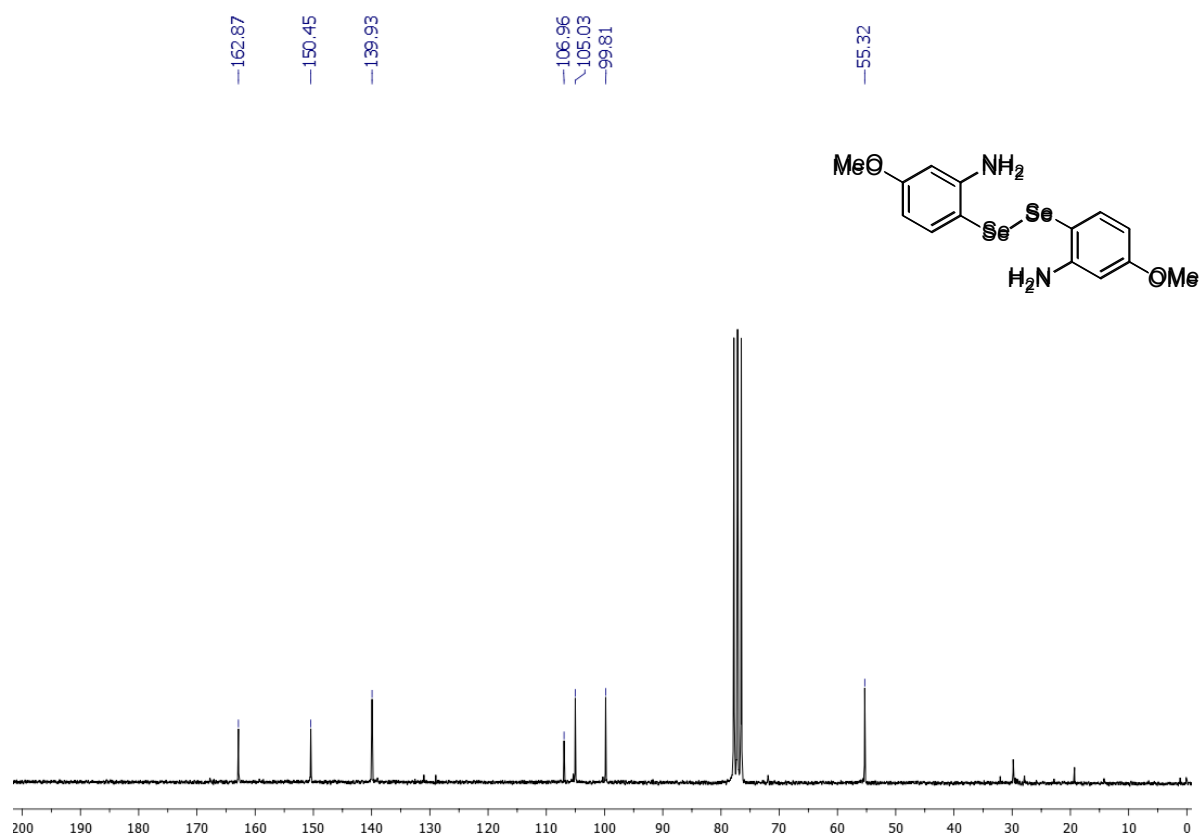

**Figure S22.** <sup>13</sup>C NMR (50 MHz, CDCl<sub>3</sub>) Spectrum of compound **3c**.

**Acquisition Parameter**

|             |            |                       |           |                  |           |
|-------------|------------|-----------------------|-----------|------------------|-----------|
| Source Type | APPI       | Ion Polarity          | Positive  | Set Nebulizer    | 3.0 Bar   |
| Focus       | Not active | Set Capillary         | 1000 V    | Set Dry Heater   | 180 °C    |
| Scan Begin  | 50 m/z     | Set End Plate Offset  | -500 V    | Set Dry Gas      | 3.0 l/min |
| Scan End    | 1000 m/z   | Set Collision Cell RF | 100.0 Vpp | Set Divert Valve | Source    |

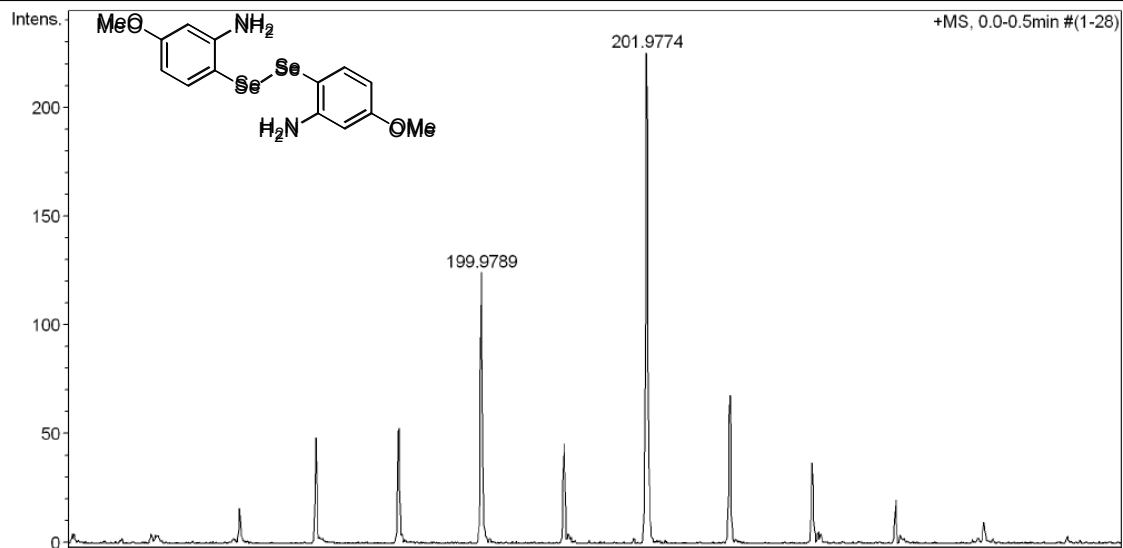

**Figure S23.** HRMS spectrum of compound **3c**.

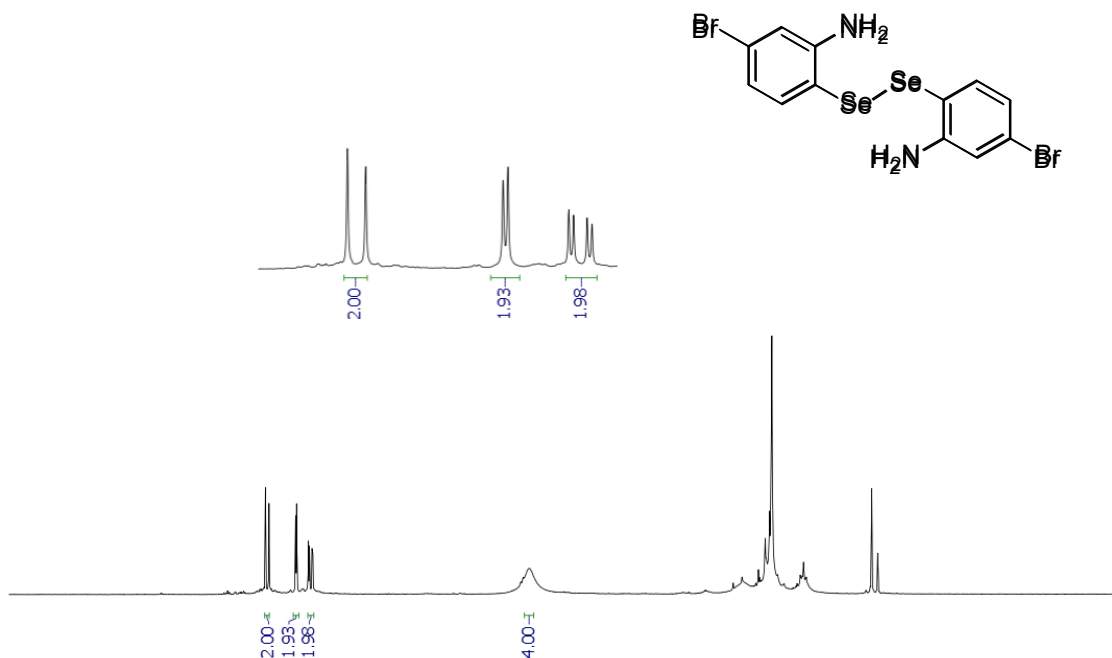

**Figure S24.** <sup>1</sup>H NMR (200 MHz, CDCl<sub>3</sub>) Spectrum of compound **3d**.

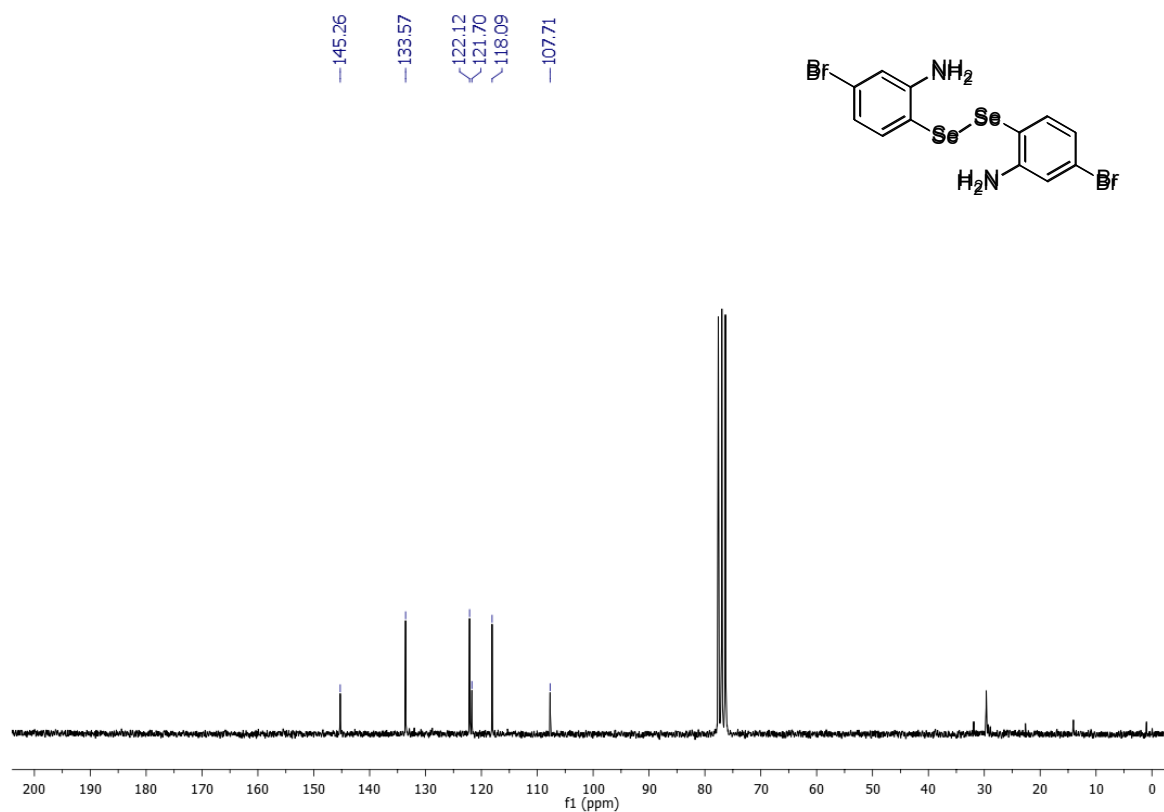

Figure S25. <sup>13</sup>C NMR (50 MHz, CDCl<sub>3</sub>) Spectrum of compound 3d.

Acquisition Parameter

|             |          |                       |           |                  |           |
|-------------|----------|-----------------------|-----------|------------------|-----------|
| Source Type | APCI     | Ion Polarity          | Positive  | Set Nebulizer    | 2.5 Bar   |
| Focus       | Active   | Set Capillary         | 4000 V    | Set Dry Heater   | 250 °C    |
| Scan Begin  | 150 m/z  | Set End Plate Offset  | -500 V    | Set Dry Gas      | 1.5 l/min |
| Scan End    | 1000 m/z | Set Collision Cell RF | 150.0 Vpp | Set Divert Valve | Source    |

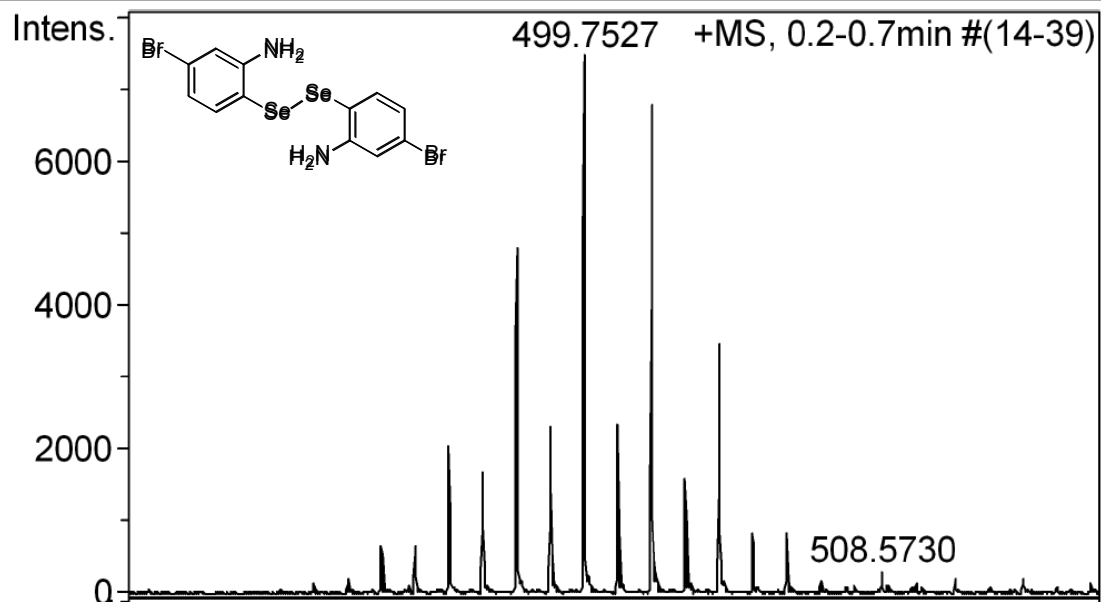

Figure S26. HRMS spectrum of compound 3d.

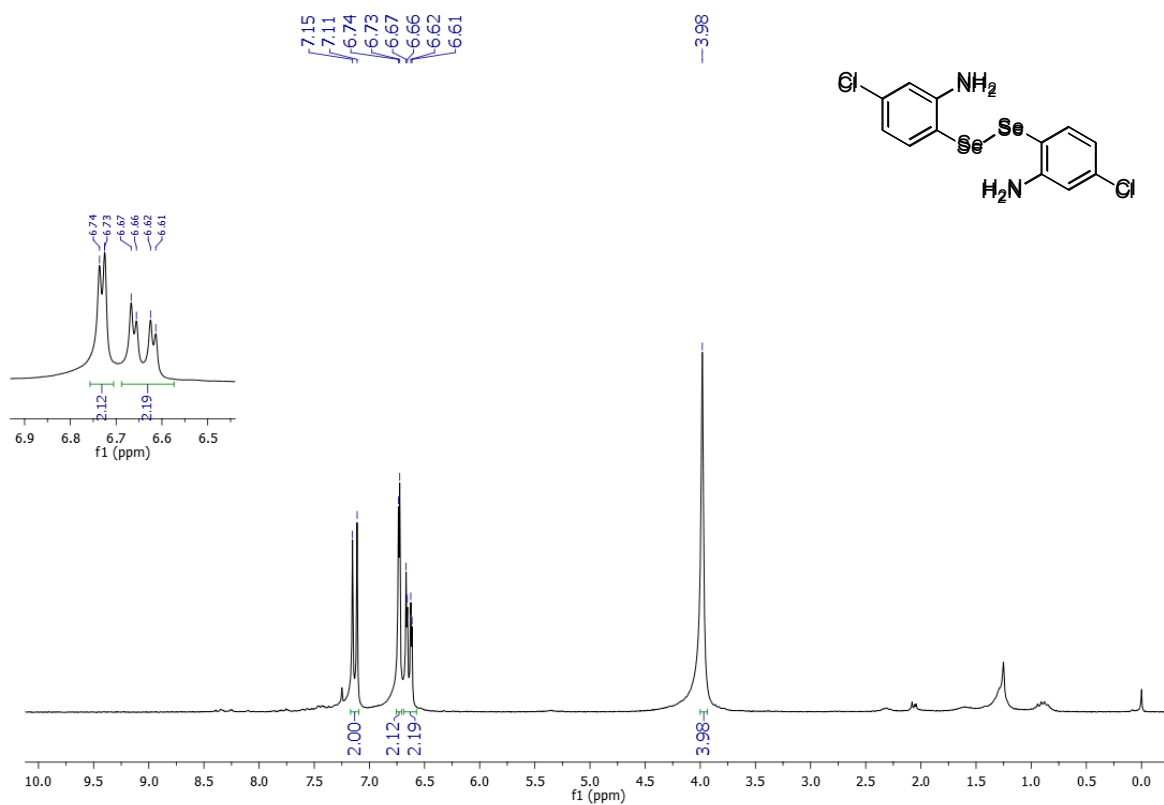

**Figure S27.** <sup>1</sup>H NMR (200 MHz, CDCl<sub>3</sub>) Spectrum of compound **3e**.

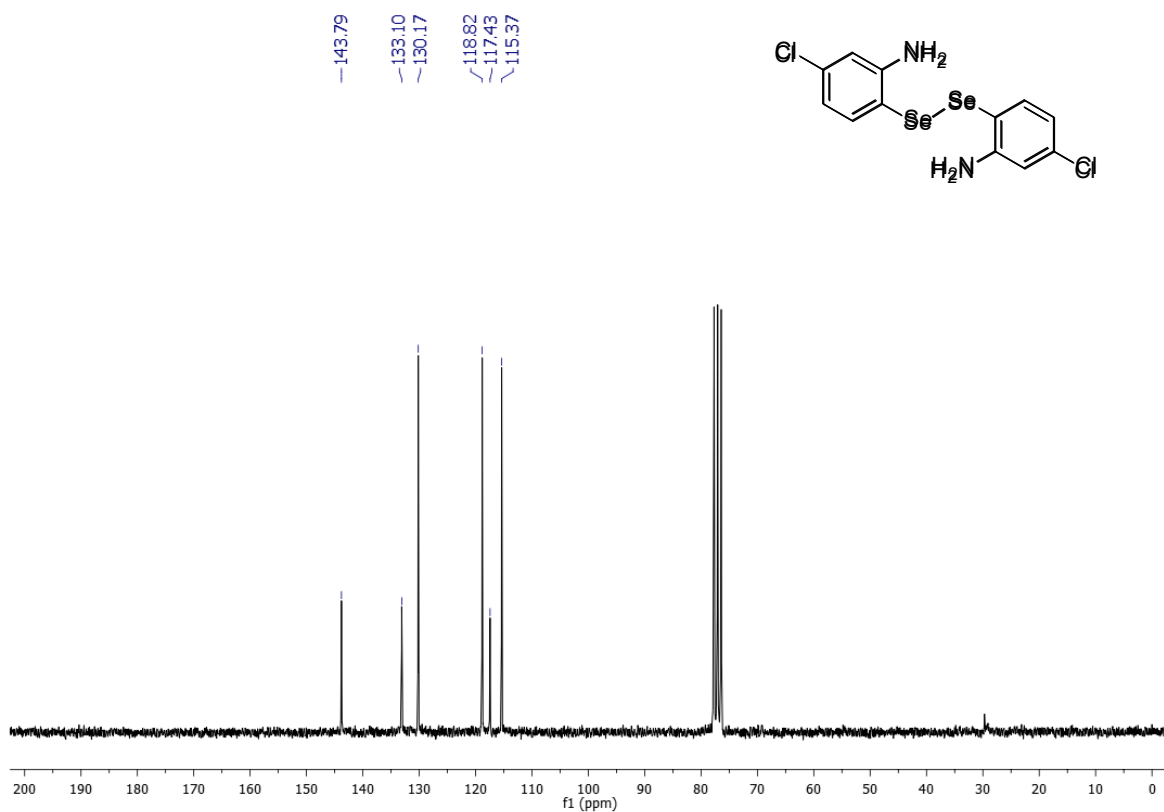

**Figure S28.** <sup>13</sup>C NMR (50 MHz, CDCl<sub>3</sub>) Spectrum of compound **3e**.

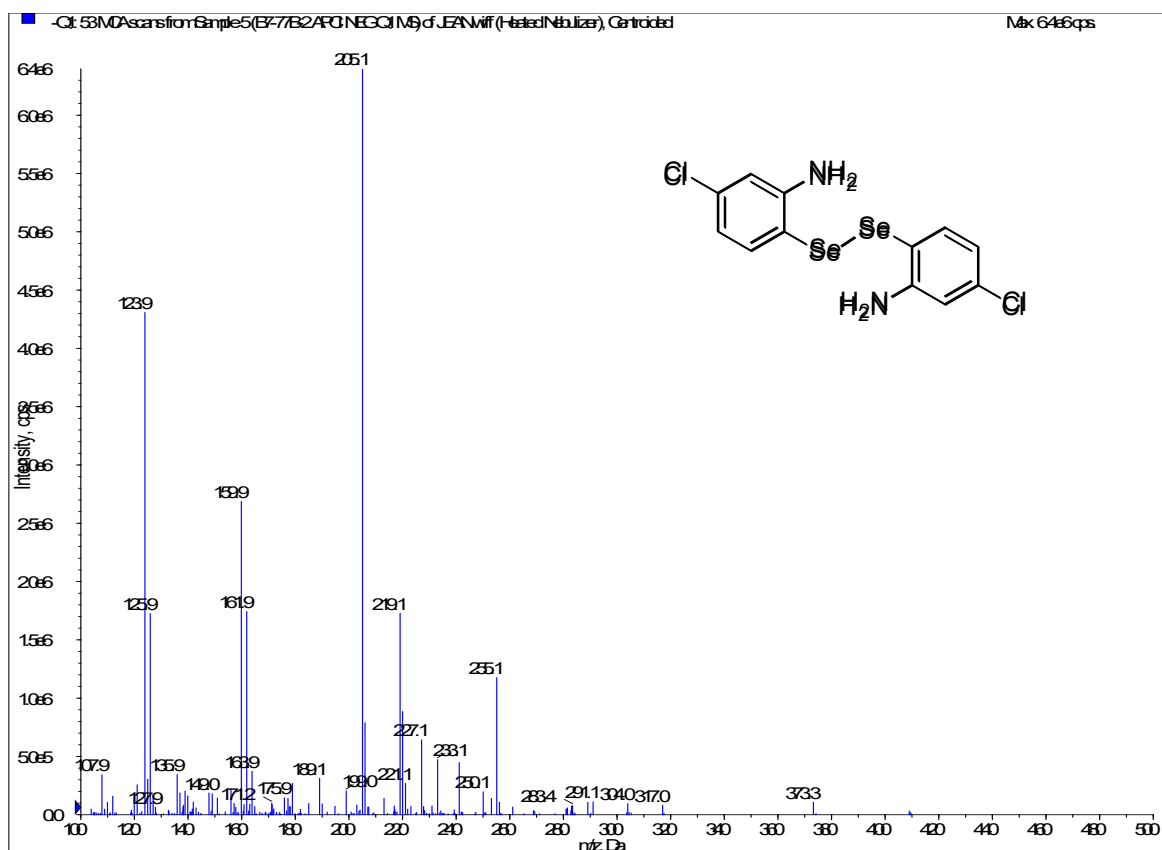

**Figure S29.** ESI-MS spectrum of compound **3e**.

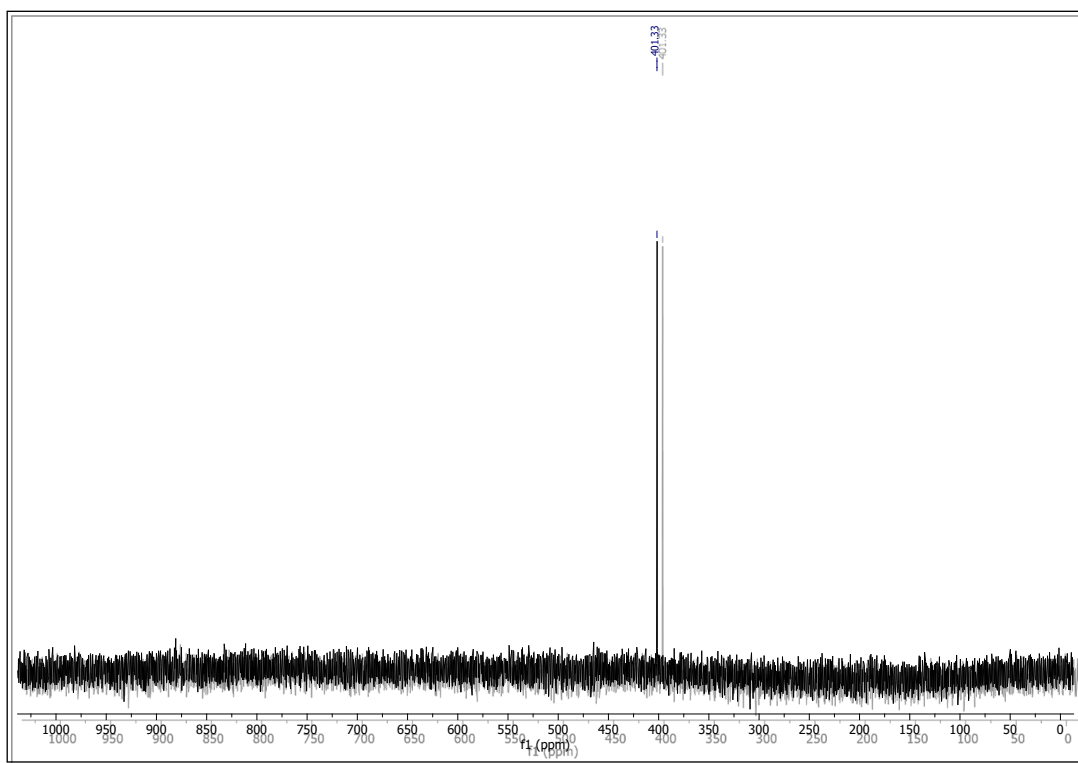

**Figure S30.**  $^{77}\text{Se}$  NMR (76 MHz,  $\text{CDCl}_3$ ) Spectrum of compound **3b**.

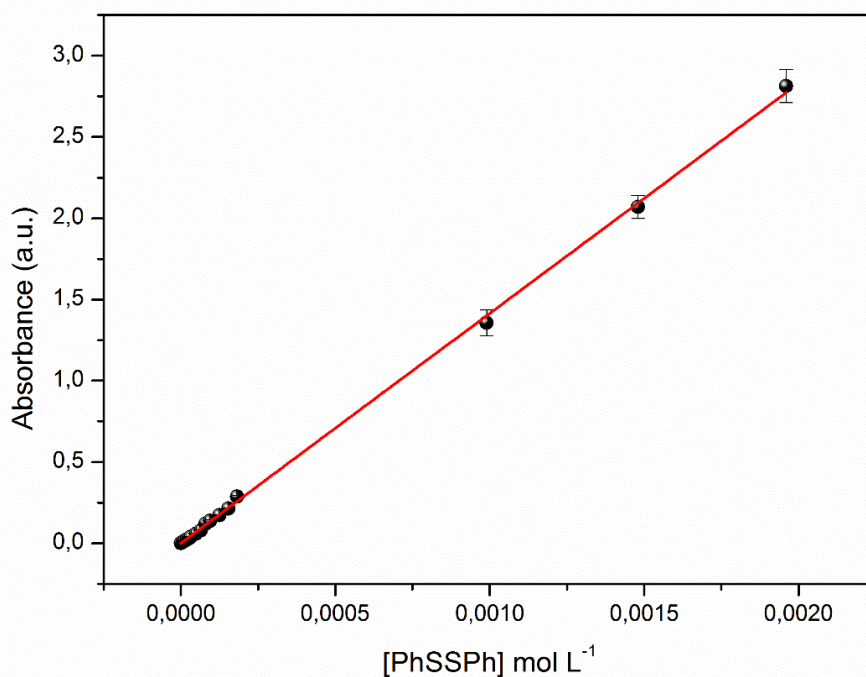

**Figure S31.** Absorbance plotted against diphenyl disulfide concentration. The red line represents the linear fit. The coefficient of molar absorptivity in 305 nm was  $1415 \text{ L mol}^{-1} \text{ cm}^{-1}$  ( $R^2 = 0.9996$ ).

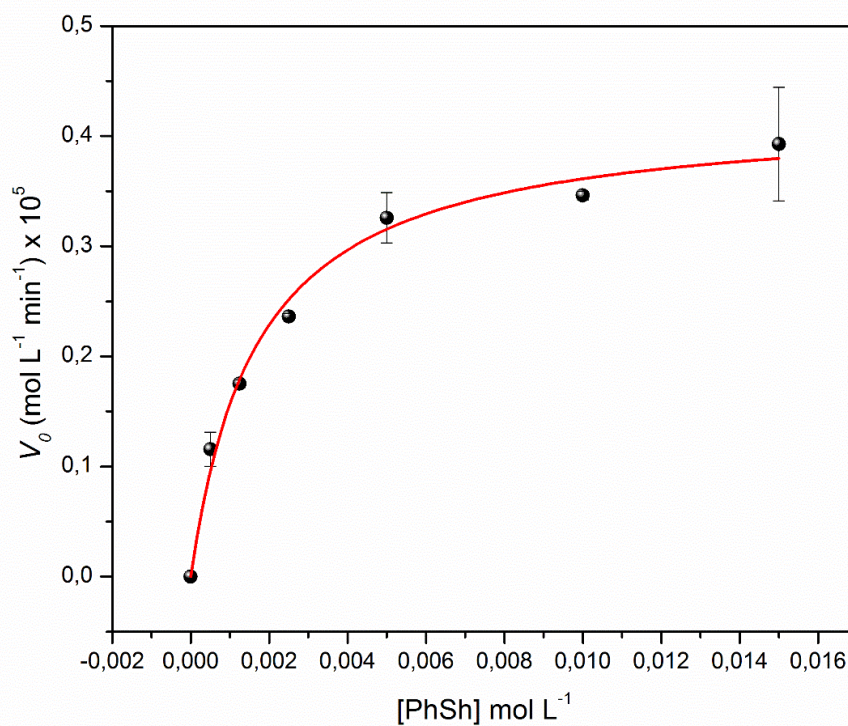

**Figure S32.** Initial rate ( $V_0$ ) plotted against substrate concentration. The initial rates were calculated from at least two experiments for each concentration of PhSH. The concentrations of ebselen and  $\text{H}_2\text{O}_2$  were fixed at  $5 \times 10^{-5}$  and  $15 \times 10^{-3} \text{ mol L}^{-1}$ , respectively. The red line represents the Michaelis-Menten fit.



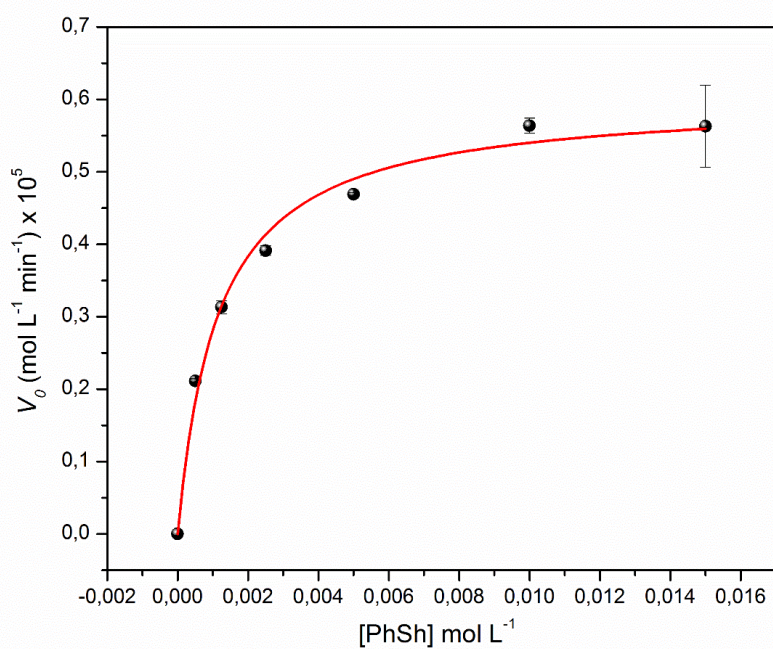

**Figure S33.** Initial rate ( $V_0$ ) plotted against substrate concentration. The initial rates were calculated from at least two experiments for each concentration of PhSH. The concentrations of diphenyl disulfide and  $\text{H}_2\text{O}_2$  were fixed at  $5 \times 10^{-5}$  and  $15 \times 10^{-3} \text{ mol L}^{-1}$ , respectively. The red line represents the Michaelis-Menten fit.

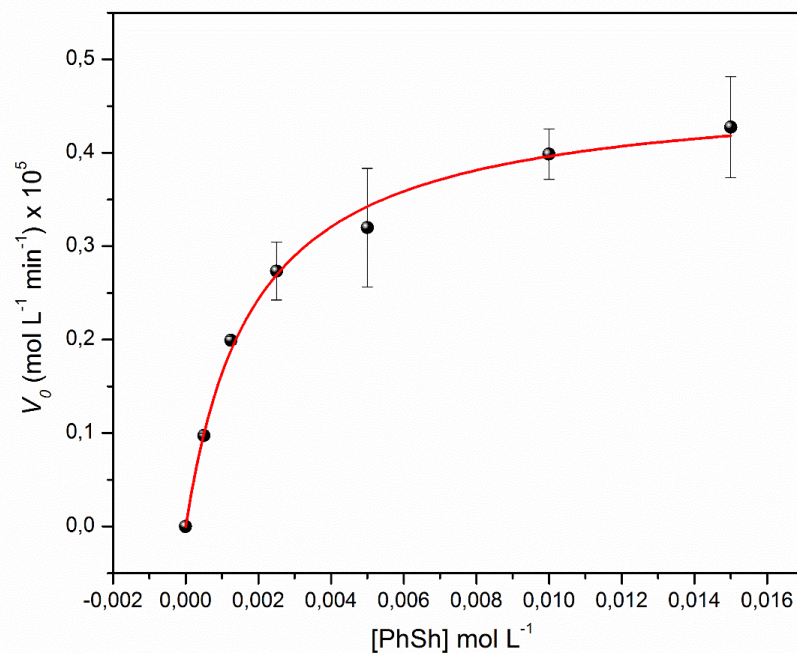

**Figure S34.** Initial rate ( $V_0$ ) plotted against substrate concentration. The initial rates were calculated from at least two experiments for each concentration of PhSH. The concentrations of **3c** and  $\text{H}_2\text{O}_2$  were fixed at  $5 \times 10^{-5}$  and  $15 \times 10^{-3} \text{ mol L}^{-1}$ , respectively. The red line represents the Michaelis-Menten fit.

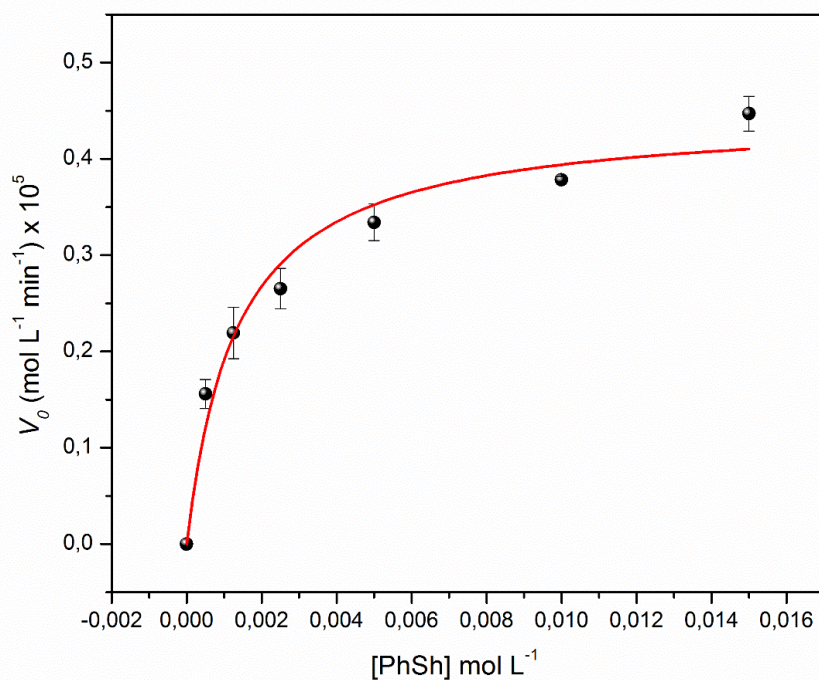

**Figure S35.** Initial rate ( $V_0$ ) plotted against substrate concentration. The initial rates were calculated from at least two experiments for each concentration of PhSH. The concentrations of **3a** and  $\text{H}_2\text{O}_2$  were fixed at  $5 \times 10^{-5}$  and  $15 \times 10^{-3} \text{ mol L}^{-1}$ , respectively. The red line represents the Michaelis-Menten fit.

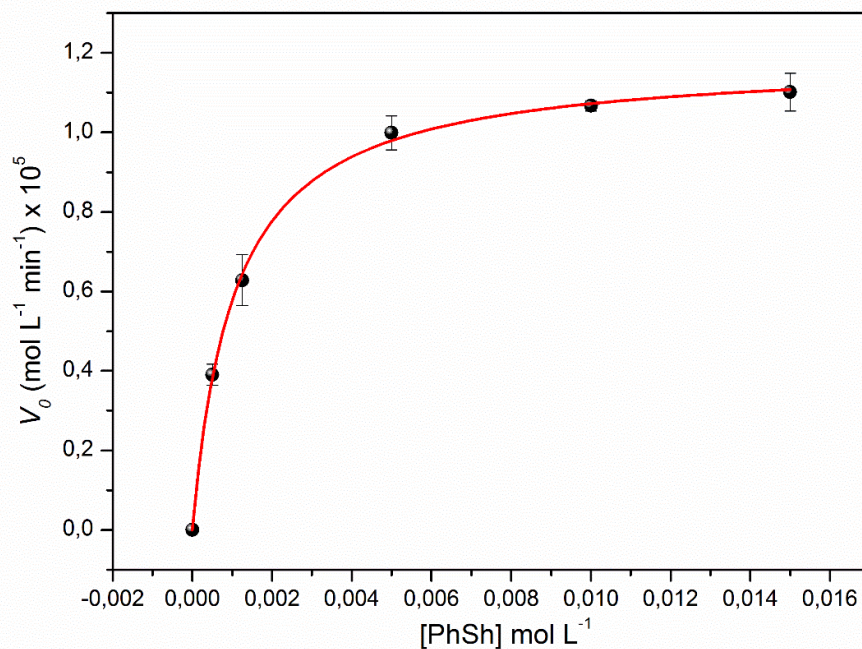

**Figure S36.** Initial rate ( $V_0$ ) plotted against substrate concentration. The initial rates were calculated from at least two experiments for each concentration of PhSH. The concentrations of **3b** and  $\text{H}_2\text{O}_2$  were fixed at  $5 \times 10^{-5}$  and  $15 \times 10^{-3} \text{ mol L}^{-1}$ , respectively. The red line represents the Michaelis-Menten fit.



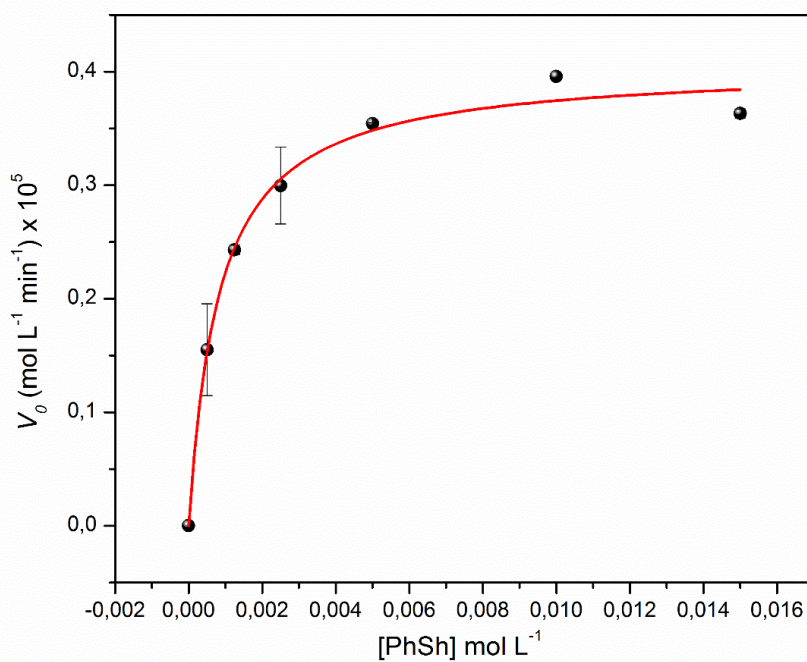

**Figure S37.** Initial rate ( $V_0$ ) plotted against substrate concentration. The initial rates were calculated from at least two experiments for each concentration of PhSH. The concentrations of **3d** and  $\text{H}_2\text{O}_2$  were fixed at  $5 \times 10^{-5}$  and  $15 \times 10^{-3} \text{ mol L}^{-1}$ , respectively. The red line represents the Michaelis-Menten fit.

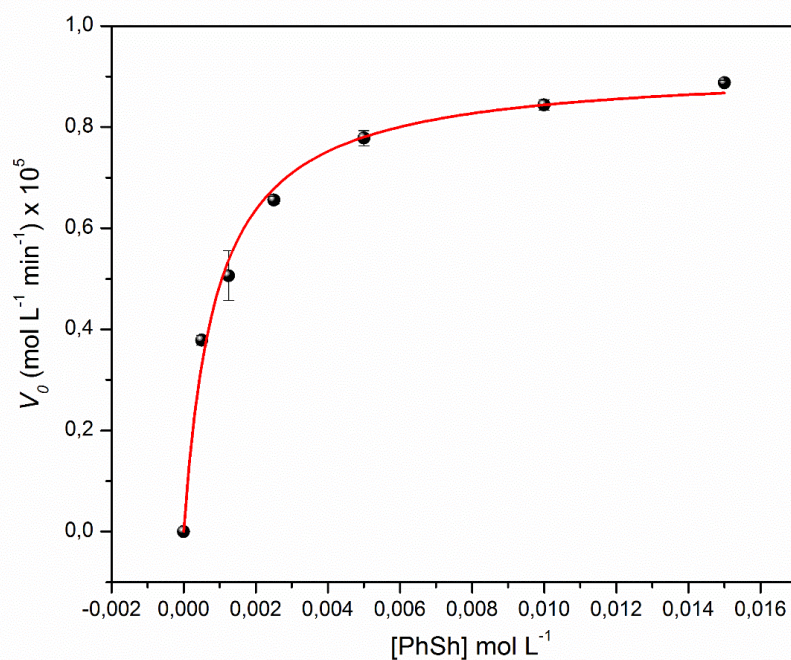

**Figure S38.** Initial rate ( $V_0$ ) plotted against substrate concentration. The initial rates were calculated from at least two experiments for each concentration of PhSH. The concentrations of **3e** and  $\text{H}_2\text{O}_2$  were fixed at  $5 \times 10^{-5}$  and  $15 \times 10^{-3} \text{ mol L}^{-1}$ , respectively. The red line represents the Michaelis-Menten fit.

**Table S1.** Atomic charges of nitrogen and selenium according to NPA.

| Aniline-diselenide species |                 |                 |
|----------------------------|-----------------|-----------------|
| Group                      | q <sub>N</sub>  | q <sub>Se</sub> |
| H                          | -0.772          | 0.108           |
| Cl                         | -0.756          | 0.102           |
| Br                         | -0.770          | 0.097           |
| OMe                        | -0.779          | 0.063           |
| CF <sub>3</sub>            | -0.753          | 0.123           |
| Selenolate species         |                 |                 |
| Group                      | q <sub>Se</sub> |                 |
| H                          | -0.523          |                 |
| Cl                         | -0.501          |                 |
| Br                         | -0.496          |                 |
| OMe                        | -0.549          |                 |
| CF <sub>3</sub>            | -0.461          |                 |

**Table S2.** Donor-acceptor second order perturbation analysis.

| Aniline-diselenide species |                 |                  |
|----------------------------|-----------------|------------------|
| Group                      | orbitals        | E <sup>(2)</sup> |
| H                          | lp(Se) → σ*(NH) | 0.81/0.78        |
| Cl                         |                 | 0.75/0.67        |
| Br                         |                 | 0.72/0.67        |
| OMe                        |                 | 0.78/0.79        |
| CF <sub>3</sub>            |                 | 0.57/0.53        |
| Selenolate species         |                 |                  |
| Group                      | orbitals        | E <sup>(2)</sup> |
| H                          | lp(Se) → σ*(NH) | 8.61             |
| Cl                         |                 | 8.84             |
| Br                         |                 | 9.05             |
| OMe                        |                 | 8.59             |
| CF <sub>3</sub>            |                 | 8.38             |

**Table S3.** DFT-computed energies for optimized geometries (in ha).

| Aniline-diselenide species |               |               |                       |
|----------------------------|---------------|---------------|-----------------------|
| Group                      | E             | G             | dispersion correction |
| H                          | -5467.165322  | -5466.98440   | -0.077360             |
| Cl                         | -6391.014966  | -6390.871822  | -0.092473             |
| Br                         | -10715.406914 | -10715.266309 | -0.096977             |
| OMe                        | -5696.551147  | -5696.328174  | -0.099039             |
| CF <sub>3</sub>            | -6142.481415  | -6052.258025  | -0.095366             |
| Selenolate species         |               |               |                       |
| Group                      | E             |               | E(solv)               |
| H                          | -2734.167058  | -2734.084209  | -0.028776             |
| Cl                         | -3196.089018  | -3196.017883  | -0.032597             |
| Br                         | -5358.284719  | -5358.215148  | -0.033721             |
| OMe                        | -2848.855074  | -2848.744559  | -0.035154             |
| CF <sub>3</sub>            | -3071.825184  | -3071.744844  | -0.035100             |

## DFT-Optimized coordinates

### 3a

Lowest vibrations

|    |                        |
|----|------------------------|
| 0: | 0.00 cm <sup>-1</sup>  |
| 1: | 0.00 cm <sup>-1</sup>  |
| 2: | 0.00 cm <sup>-1</sup>  |
| 3: | 0.00 cm <sup>-1</sup>  |
| 4: | 0.00 cm <sup>-1</sup>  |
| 5: | 0.00 cm <sup>-1</sup>  |
| 6: | 25.40 cm <sup>-1</sup> |
| 7: | 44.18 cm <sup>-1</sup> |
| 8: | 59.89 cm <sup>-1</sup> |
| 9: | 66.49 cm <sup>-1</sup> |

|    |                   |                   |                  |
|----|-------------------|-------------------|------------------|
| H  | -1.11995123171601 | 0.68290730604730  | 1.09318888943208 |
| C  | -0.31678747464897 | 0.50159292524914  | 1.81116122526089 |
| C  | 1.71676592277174  | 0.05195428086503  | 3.66891810018365 |
| C  | -0.26838230725007 | -0.74821576147558 | 2.47168832716922 |
| C  | 0.62096754871581  | 1.49236584038847  | 2.07651297567091 |
| C  | 1.65196113586393  | 1.27651822224948  | 3.00637841847999 |
| C  | 0.77364629402148  | -0.95513376591016 | 3.41487682888642 |
| H  | 0.54644560846461  | 2.44972182557411  | 1.55752494287594 |
| H  | 2.38848393419269  | 2.05401474989847  | 3.21295200804860 |
| H  | 2.49576100684962  | -0.13212874647668 | 4.41056797869604 |
| N  | -1.18564704283468 | -1.73471077038928 | 2.15167389997383 |
| H  | -1.26237890817569 | -2.47658065468711 | 2.84904758892737 |
| H  | -2.09355602705203 | -1.39445135674383 | 1.84197289199333 |
| Se | 0.81301340756633  | -2.58268482381411 | 4.45021804706206 |
| Se | -0.41566666533828 | -1.72638141244934 | 6.36319969416012 |
| C  | -2.00686391063788 | -1.21505473472314 | 5.41165809483272 |
| C  | -4.23181263903806 | -0.41059450880111 | 3.93198858975477 |
| C  | -2.13074201802973 | 0.11574092030916  | 4.98728262670319 |
| C  | -2.99422938105252 | -2.18002186363118 | 5.07089802393036 |
| C  | -4.11746236898284 | -1.73891942877572 | 4.33661769710581 |
| C  | -3.24256028863571 | 0.53020345233482  | 4.25329030396330 |
| H  | -1.33681787089179 | 0.82117054253421  | 5.23449958753021 |
| H  | -4.88764366315297 | -2.46492773529972 | 4.06763111217761 |
| H  | -3.32782218316214 | 1.56502841016932  | 3.92178122195720 |
| H  | -5.10679537314913 | -0.10558307585242 | 3.35490805488276 |
| N  | -2.82804881586087 | -3.51825972305358 | 5.36209147973068 |
| H  | -2.14265269593607 | -3.73347506570535 | 6.08609423840574 |
| H  | -3.66922399290075 | -4.08809504783118 | 5.39337715220523 |

### 3b

Lowest vibrations:

|    |                       |
|----|-----------------------|
| 0: | 0.00 cm <sup>-1</sup> |
| 1: | 0.00 cm <sup>-1</sup> |
| 2: | 0.00 cm <sup>-1</sup> |
| 3: | 0.00 cm <sup>-1</sup> |

4: 0.00 cm<sup>-1</sup>  
 5: 0.00 cm<sup>-1</sup>  
 6: 19.80 cm<sup>-1</sup>  
 7: 28.23 cm<sup>-1</sup>  
 8: 31.04 cm<sup>-1</sup>  
 9: 47.04 cm<sup>-1</sup>

|    |                   |                   |                   |
|----|-------------------|-------------------|-------------------|
| H  | 4.79743867513424  | 2.74120186277606  | 0.41297968375714  |
| C  | 4.05920423270670  | 2.90991714602625  | -0.37249979036204 |
| C  | 2.13316450785802  | 3.29045416196159  | -2.35794032006068 |
| C  | 4.30551847141409  | 2.39026992415407  | -1.66195450071264 |
| C  | 2.87570156181610  | 3.58941748573120  | -0.09608013615801 |
| C  | 1.90320799465386  | 3.80177535754421  | -1.08395970935988 |
| C  | 3.31837455759609  | 2.60920871688873  | -2.66465747858666 |
| H  | 0.97398250886091  | 4.31984011948069  | -0.85585256306564 |
| H  | 1.37597977936551  | 3.40676260402541  | -3.13337769601455 |
| N  | 5.46950201569576  | 1.71782524249113  | -1.92783625666608 |
| H  | 5.48787245047932  | 1.14693052339060  | -2.77031496873330 |
| H  | 5.99450018462427  | 1.34947868711661  | -1.14057042856000 |
| Se | 3.48299106133143  | 1.82980116040769  | -4.40835571677536 |
| Se | 2.94504517415263  | -0.47684324271634 | -3.69801721635214 |
| C  | 1.61871041380553  | 0.01881389151636  | -2.40782720293940 |
| C  | -0.16749631647462 | 0.89513904988180  | -0.45982407845308 |
| C  | 1.98141832459906  | 0.00926397252077  | -1.05493453106130 |
| C  | 0.33964274356270  | 0.50012867082050  | -2.80970218935107 |
| C  | -0.54927842035956 | 0.92497402723761  | -1.79860698845202 |
| C  | 1.09467844441306  | 0.42747908694295  | -0.06627998840500 |
| H  | 2.98116893023952  | -0.32563965660046 | -0.78020316849073 |
| H  | -1.53043312165904 | 1.30516166793161  | -2.08581731662843 |
| H  | 1.39029280280264  | 0.42058007790935  | 0.98084881851617  |
| N  | -0.04059877328525 | 0.53147345268519  | -4.12460665679107 |
| H  | 0.69613468407031  | 0.45940754025182  | -4.82298113380483 |
| H  | -0.82948426546722 | 1.11737421909345  | -4.37910896600160 |
| C  | -1.16232446378991 | 1.34913454597804  | 0.57314823635719  |
| C  | 2.66580245571383  | 4.13479616087899  | 1.28962884231232  |
| F  | -0.59979611608059 | 1.56558345098889  | 1.79452089390986  |
| F  | -1.79204886938204 | 2.51203117711008  | 0.21686211059663  |
| F  | -2.16150539449478 | 0.42343658387770  | 0.76516507302339  |
| F  | 1.35202203788763  | 4.35851198856633  | 1.57516340927720  |
| F  | 3.14478694117015  | 3.29845270125524  | 2.26070941898640  |
| F  | 3.30982478703965  | 5.33685764187590  | 1.47328251504929  |

### 3c

Lowest vibrations:

0: 0.00 cm<sup>-1</sup>  
 1: 0.00 cm<sup>-1</sup>  
 2: 0.00 cm<sup>-1</sup>  
 3: 0.00 cm<sup>-1</sup>  
 4: 0.00 cm<sup>-1</sup>  
 5: 0.00 cm<sup>-1</sup>

6: 29.11 cm<sup>\*\*</sup>-1  
 7: 41.05 cm<sup>\*\*</sup>-1  
 8: 49.22 cm<sup>\*\*</sup>-1  
 9: 60.13 cm<sup>\*\*</sup>-1

|    |                   |                   |                   |
|----|-------------------|-------------------|-------------------|
| H  | 4.15604299727505  | -0.64350800153578 | -1.87636343004221 |
| C  | 3.77600195109139  | -0.92870182405496 | -2.85628416415989 |
| C  | 2.75419150933566  | -1.64020163861507 | -5.35628554054054 |
| C  | 3.26591823368876  | 0.08161637160312  | -3.69794361618006 |
| C  | 3.74481696418546  | -2.26451599505266 | -3.25290249611268 |
| C  | 3.26230942082604  | -2.62797657411104 | -4.52895920188453 |
| C  | 2.73476034483649  | -0.28753669900605 | -4.96537872429954 |
| H  | 3.25454588443421  | -3.67773720860038 | -4.82268355374111 |
| H  | 2.32953593066759  | -1.91123985052086 | -6.32344102354028 |
| N  | 3.34889836200538  | 1.40405714768714  | -3.29762702518812 |
| H  | 2.65557331940914  | 2.01368994580631  | -3.73816200923333 |
| H  | 3.38679633608427  | 1.53724086375024  | -2.28917656990786 |
| Se | 1.80220540162292  | 0.99505892641277  | -6.02172280843297 |
| Se | -0.51168200283967 | 0.42385071536901  | -5.18374212841024 |
| C  | -0.00095719987762 | -0.10595800246297 | -3.42998645778271 |
| C  | 0.92966138697260  | -0.95388026935196 | -0.92643880981784 |
| C  | 0.18644947665843  | -1.47396624822236 | -3.15457578524457 |
| C  | 0.29955146509508  | 0.85729655686325  | -2.42620400707857 |
| C  | 0.75249026619016  | 0.40954057022529  | -1.16533443012687 |
| C  | 0.62628933479078  | -1.91120389795268 | -1.91749216212599 |
| H  | -0.01531832908301 | -2.19803379185336 | -3.94372542447860 |
| H  | 0.99903903269320  | 1.15194963569031  | -0.40717423783104 |
| H  | 0.79120682867211  | -2.96859300416380 | -1.71178896935327 |
| O  | 1.40982980720316  | -1.46143332674273 | 0.24981097626862  |
| C  | 1.80628890710427  | -0.52503260361336 | 1.26964598213953  |
| H  | 2.60758362651894  | 0.13611578358194  | 0.90495354938058  |
| H  | 2.17803290365527  | -1.13442163686128 | 2.09920260202398  |
| H  | 0.95015029189037  | 0.07928286649099  | 1.60565385002682  |
| N  | 0.24150096351328  | 2.20286134916555  | -2.69659370974379 |
| H  | -0.28688691153990 | 2.46923965561430  | -3.52733357634196 |
| H  | 0.17507560863827  | 2.84208979658086  | -1.90992828098049 |
| O  | 4.15826656813786  | -3.29979292894537 | -2.46128419830030 |
| C  | 4.51192371601629  | -2.99187921751813 | -1.09797644749597 |
| H  | 5.38956850896804  | -2.32898921309123 | -1.05609111008641 |
| H  | 4.75587530468394  | -3.95298616330849 | -0.63483909537002 |
| H  | 3.66325379047574  | -2.52735208925656 | -0.57270796600777 |

### 3d

Lowest vibrations

0: 0.00 cm<sup>\*\*</sup>-1  
 1: 0.00 cm<sup>\*\*</sup>-1  
 2: 0.00 cm<sup>\*\*</sup>-1  
 3: 0.00 cm<sup>\*\*</sup>-1  
 4: 0.00 cm<sup>\*\*</sup>-1  
 5: 0.00 cm<sup>\*\*</sup>-1

6: 21.29 cm\*\*<sup>-1</sup>  
 7: 30.06 cm\*\*<sup>-1</sup>  
 8: 35.53 cm\*\*<sup>-1</sup>  
 9: 59.10 cm\*\*<sup>-1</sup>

|    |                   |                   |                   |
|----|-------------------|-------------------|-------------------|
| H  | 1.72741878838432  | 3.36675068476418  | -0.54749410379097 |
| C  | 2.02552767006022  | 3.02549041934578  | -1.53842963667332 |
| C  | 2.79842642110032  | 2.07701005295066  | -4.05211386563797 |
| C  | 1.07648726380430  | 3.02034990301711  | -2.58632136173693 |
| C  | 3.30735365154790  | 2.55527487864684  | -1.77096452413821 |
| C  | 3.73440440799733  | 2.09153784605571  | -3.01994891625763 |
| C  | 1.48225622243754  | 2.51700448257266  | -3.85480120480051 |
| H  | 4.74875101418722  | 1.72945047182429  | -3.17575461719490 |
| H  | 3.08265797823365  | 1.68186840391415  | -5.02802747083180 |
| N  | -0.18524270902245 | 3.53257341834246  | -2.36971623141844 |
| H  | -0.90582661814027 | 3.16112365195404  | -2.99373825970885 |
| H  | -0.48231728391131 | 3.56149517395526  | -1.39719826899381 |
| Se | 0.17209690701440  | 2.24726234887191  | -5.22837580352926 |
| Se | -0.14124908409351 | -0.18705434217868 | -4.81681627276899 |
| C  | 0.13371731394446  | -0.12385930081514 | -2.92630945030130 |
| C  | 0.70041185549990  | 0.13956813965627  | -0.22915036166525 |
| C  | 1.38940091819808  | -0.49212417293927 | -2.42192081800853 |
| C  | -0.86881375661683 | 0.38814217667867  | -2.05454963615824 |
| C  | -0.55912072771877 | 0.50695471585638  | -0.67931047651289 |
| C  | 1.69173258737413  | -0.38025648591162 | -1.06754809153788 |
| H  | 2.14906943553830  | -0.85716343795437 | -3.11247578460593 |
| H  | -1.30148353794476 | 0.91891594725214  | 0.00418829194740  |
| H  | 2.67513842002545  | -0.64764718091621 | -0.68744600280413 |
| Br | 1.12117173653266  | 0.40376708007304  | 1.63268866924783  |
| N  | -2.06540995599422 | 0.85263863944408  | -2.53634205738654 |
| H  | -2.32306422615339 | 0.54961216569945  | -3.47515008172795 |
| H  | -2.83476406810794 | 0.95464607453254  | -1.88111731994186 |
| Br | 4.53836937582325  | 2.49101824530766  | -0.28999634306314 |

### 3e

Lowest vibrations:

0: 0.00 cm\*\*<sup>-1</sup>  
 1: 0.00 cm\*\*<sup>-1</sup>  
 2: 0.00 cm\*\*<sup>-1</sup>  
 3: 0.00 cm\*\*<sup>-1</sup>  
 4: 0.00 cm\*\*<sup>-1</sup>  
 5: 0.00 cm\*\*<sup>-1</sup>  
 6: 21.26 cm\*\*<sup>-1</sup>  
 7: 36.23 cm\*\*<sup>-1</sup>  
 8: 43.40 cm\*\*<sup>-1</sup>  
 9: 60.25 cm\*\*<sup>-1</sup>

|   |                  |                  |                   |
|---|------------------|------------------|-------------------|
| H | 0.88697127019777 | 4.11295775029334 | -0.34889181233324 |
| C | 1.83365811626601 | 3.71331311240774 | -0.71146468529065 |
| C | 4.25714696744385 | 2.63259849411581 | -1.59112080310255 |

|    |                   |                   |                   |
|----|-------------------|-------------------|-------------------|
| C  | 1.96343559663932  | 3.34820933891733  | -2.07056168971290 |
| C  | 2.89778318852689  | 3.52603937564369  | 0.15539667671070  |
| C  | 4.12852177232382  | 3.00042558407069  | -0.25359122189582 |
| C  | 3.20006103516693  | 2.78687619604530  | -2.49813116356264 |
| H  | 4.94694310161100  | 2.86512083443131  | 0.45111770997984  |
| H  | 5.18908154447761  | 2.18481223926003  | -1.93764768339732 |
| N  | 0.92433171313051  | 3.58353448079605  | -2.94476733193137 |
| H  | 0.92449595657326  | 2.98849224024976  | -3.77676218963768 |
| H  | 0.00506370722313  | 3.66965926457227  | -2.51807762208665 |
| Se | 3.34418141002663  | 2.05631802824798  | -4.26602869719739 |
| Se | 2.97137445121165  | -0.30883956130604 | -3.60420678160435 |
| C  | 1.73273070362307  | 0.05364025344775  | -2.19426614589297 |
| C  | 0.05968658841637  | 0.74937436669295  | -0.09898523758325 |
| C  | 2.20222405627452  | 0.04530737519793  | -0.87300253674956 |
| C  | 0.38796886415530  | 0.42656178807230  | -2.47496341678784 |
| C  | -0.45022689185271 | 0.76716680822322  | -1.38873836169969 |
| C  | 1.37596579012868  | 0.37994456886357  | 0.19574904993954  |
| H  | 3.24302091796439  | -0.21625243191635 | -0.68501274993986 |
| H  | -1.47904409818880 | 1.07442106523349  | -1.57659344780222 |
| H  | 1.75020137269933  | 0.39040889333436  | 1.21743539664993  |
| Cl | -0.99837845973744 | 1.24812250747542  | 1.23126963533667  |
| N  | -0.06378338155135 | 0.55380307811011  | -3.76273705665362 |
| H  | 0.49082959453543  | 0.09666030570070  | -4.48563204822562 |
| H  | -1.06754930932086 | 0.56267574370305  | -3.91846289118708 |
| Cl | 2.67441442203567  | 3.93896830011627  | 1.86403710565757  |

### Selenolate a

Lowest vibrations:

- 0: 0.00 cm<sup>-1</sup>
- 1: 0.00 cm<sup>-1</sup>
- 2: 0.00 cm<sup>-1</sup>
- 3: 0.00 cm<sup>-1</sup>
- 4: 0.00 cm<sup>-1</sup>
- 5: 0.00 cm<sup>-1</sup>
- 6: -148.56 cm<sup>-1</sup> \*\*\*imaginary mode\*\*\*
- 7: 125.86 cm<sup>-1</sup>
- 8: 208.41 cm<sup>-1</sup>
- 9: 226.12 cm<sup>-1</sup>

|   |                   |                   |                   |
|---|-------------------|-------------------|-------------------|
| H | -1.98379784213075 | 0.86108704767195  | -0.15521264293190 |
| C | -1.10826827158794 | 0.48053001853928  | -0.68481847290146 |
| C | 1.11326193750329  | -0.48329548815015 | -2.09501041601034 |
| C | -1.08314022429435 | 0.47026564670907  | -2.07569338840646 |
| C | 0.00084500748212  | -0.00129275021577 | 0.01674928294306  |
| C | 1.10735065764388  | -0.48153116172805 | -0.69913092023730 |
| C | 0.00921409455851  | -0.00328665638315 | -2.83202073912128 |
| H | 1.97892957693919  | -0.85974946580347 | -0.16120250927580 |
| H | 1.98355268341027  | -0.86070287421280 | -2.63382293232877 |
| N | -2.23708893048175 | 0.97086865065798  | -2.83872476126260 |

|    |                   |                   |                   |
|----|-------------------|-------------------|-------------------|
| H  | -1.94926718440342 | 0.86746778823246  | -3.86190305717725 |
| H  | -3.09202561101629 | 0.42273176961366  | -2.67804639918635 |
| H  | -2.44754899407057 | 1.95855247564631  | -2.64704935800886 |
| Se | -0.05324676276851 | 0.02743312906847  | -4.75082259878933 |
| H  | -0.00018013678368 | -0.00090812964579 | 1.10721891269463  |

### Selenolate b

Lowest vibrations:

|    |                                               |
|----|-----------------------------------------------|
| 0: | 0.00 cm <sup>-1</sup>                         |
| 1: | 0.00 cm <sup>-1</sup>                         |
| 2: | 0.00 cm <sup>-1</sup>                         |
| 3: | 0.00 cm <sup>-1</sup>                         |
| 4: | 0.00 cm <sup>-1</sup>                         |
| 5: | 0.00 cm <sup>-1</sup>                         |
| 6: | -167.34 cm <sup>-1</sup> ***imaginary mode*** |
| 7: | 1.62 cm <sup>-1</sup>                         |
| 8: | 65.94 cm <sup>-1</sup>                        |
| 9: | 141.98 cm <sup>-1</sup>                       |

|    |                   |                   |                   |
|----|-------------------|-------------------|-------------------|
| H  | -2.01155895040243 | 0.83164680446368  | -0.16198957568798 |
| C  | -1.12924605782821 | 0.46737404074564  | -0.68829897901653 |
| C  | 1.11909879474808  | -0.46419277606597 | -2.08318559205302 |
| C  | -1.09096497370755 | 0.46535035058600  | -2.07441361980188 |
| C  | -0.01836188937624 | -0.01348453352356 | 0.01373057023330  |
| C  | 1.10689691013610  | -0.47438677350269 | -0.69393052920416 |
| C  | 0.01389926840768  | 0.00933429601528  | -2.82860969820299 |
| H  | 1.97665378243913  | -0.84818094895431 | -0.15203689891839 |
| H  | 1.99779122265613  | -0.82867307436704 | -2.61573132168029 |
| N  | -2.24493387792364 | 0.95613093501172  | -2.83946320300421 |
| H  | -1.94856716768417 | 0.86958354428693  | -3.86130131530105 |
| H  | -3.09188412359622 | 0.39124684148297  | -2.69378199027972 |
| H  | -2.47327862104435 | 1.93801516512940  | -2.63772996837933 |
| Se | -0.03088871100356 | 0.05075188969799  | -4.73301719319549 |
| C  | 0.00669340823619  | 0.00354593482474  | 1.50897073007007  |
| F  | -1.22587209777372 | 0.20028564674805  | 2.06121018443481  |
| F  | 0.49466644121173  | -1.16460816272538 | 2.03623198830560  |
| F  | 0.81614664250504  | 1.00019082014656  | 2.01081641168124  |

### Selenolate c

Lowest vibrations:

|    |                                               |
|----|-----------------------------------------------|
| 0: | 0.00 cm <sup>-1</sup>                         |
| 1: | 0.00 cm <sup>-1</sup>                         |
| 2: | 0.00 cm <sup>-1</sup>                         |
| 3: | 0.00 cm <sup>-1</sup>                         |
| 4: | 0.00 cm <sup>-1</sup>                         |
| 5: | 0.00 cm <sup>-1</sup>                         |
| 6: | -143.85 cm <sup>-1</sup> ***imaginary mode*** |
| 7: | 65.76 cm <sup>-1</sup>                        |
| 8: | 118.16 cm <sup>-1</sup>                       |
| 9: | 172.83 cm <sup>-1</sup>                       |



|    |                   |                   |                   |
|----|-------------------|-------------------|-------------------|
| H  | -1.50681690957051 | 1.37048059098675  | -0.13540902957073 |
| C  | -0.76962617629341 | 0.78707796371293  | -0.68522952241761 |
| C  | 1.07139479557236  | -0.70835639935190 | -2.17993832300391 |
| C  | -0.93561679036207 | 0.56943964997234  | -2.05381243235639 |
| C  | 0.35486392763825  | 0.23769929184576  | -0.05716480984745 |
| C  | 1.27186678844256  | -0.51202876021834 | -0.81801545664600 |
| C  | -0.04894250775574 | -0.17015360626903 | -2.85195281294989 |
| H  | 2.14560507057469  | -0.93754279669828 | -0.32176555155499 |
| H  | 1.79778227261921  | -1.29275940332742 | -2.74644973891700 |
| N  | -2.10821481603433 | 1.13765323041494  | -2.73648420179382 |
| H  | -2.00006180542523 | 0.83150542036525  | -3.75414549228536 |
| H  | -2.99983867992893 | 0.77839830769301  | -2.37168415099993 |
| H  | -2.13540253290684 | 2.16511822758803  | -2.69829962334319 |
| Se | -0.38271295777702 | -0.40605859738147 | -4.73324083666604 |
| O  | 0.64065130978495  | 0.37593854634706  | 1.27798654079079  |
| C  | -0.28083480528555 | 1.14723760239267  | 2.06869385217076  |
| H  | -0.34929413550508 | 2.18292561729720  | 1.70010406981074  |
| H  | 0.12750726016421  | 1.14387919135822  | 3.08437259219039  |
| H  | -1.28165930795150 | 0.68736592327226  | 2.06809492738969  |

#### Selenolate d

Lowest vibrations:

- 0: 0.00 cm<sup>-1</sup>
- 1: 0.00 cm<sup>-1</sup>
- 2: 0.00 cm<sup>-1</sup>
- 3: 0.00 cm<sup>-1</sup>
- 4: 0.00 cm<sup>-1</sup>
- 5: 0.00 cm<sup>-1</sup>
- 6: -144.78 cm<sup>-1</sup> \*\*\*imaginary mode\*\*\*
- 7: 70.38 cm<sup>-1</sup>
- 8: 156.88 cm<sup>-1</sup>
- 9: 163.29 cm<sup>-1</sup>

|    |                   |                   |                   |
|----|-------------------|-------------------|-------------------|
| H  | 0.56257357662590  | -2.01445105662372 | -1.59170963301840 |
| C  | 1.20672788182421  | -1.14659234573054 | -1.73407558380459 |
| C  | 2.84593001855644  | 1.10631545090188  | -2.07403102680738 |
| C  | 1.02684316869084  | 0.00610175962744  | -0.97618049537681 |
| C  | 2.23477612282847  | -1.14941280902985 | -2.67543382764048 |
| C  | 3.05584559298310  | -0.03191848042703 | -2.85323969605365 |
| C  | 1.82219610348520  | 1.16477381451323  | -1.10463876342506 |
| H  | 3.85539402566823  | -0.04486656064741 | -3.59429786803759 |
| H  | 3.49131603436344  | 1.97374246499957  | -2.21872715968098 |
| N  | -0.04557511057684 | 0.06130416765836  | 0.02541214191152  |
| H  | 0.04904306658868  | 1.03422853069413  | 0.46082974055114  |
| H  | -0.98378931859589 | -0.02860049796480 | -0.38597401520395 |
| H  | 0.05334086346586  | -0.64888148107665 | 0.76258236000127  |
| Se | 1.48787524889724  | 2.69408387449993  | -0.00287965888474 |
| Br | 2.52193272519511  | -2.72406683139454 | -3.74675651453027 |

## Selenolate e

Lowest vibrations:

|    |                                               |
|----|-----------------------------------------------|
| 0: | 0.00 cm <sup>-1</sup>                         |
| 1: | 0.00 cm <sup>-1</sup>                         |
| 2: | 0.00 cm <sup>-1</sup>                         |
| 3: | 0.00 cm <sup>-1</sup>                         |
| 4: | 0.00 cm <sup>-1</sup>                         |
| 5: | 0.00 cm <sup>-1</sup>                         |
| 6: | -147.20 cm <sup>-1</sup> ***imaginary mode*** |
| 7: | 80.84 cm <sup>-1</sup>                        |
| 8: | 171.54 cm <sup>-1</sup>                       |
| 9: | 184.86 cm <sup>-1</sup>                       |

|    |                   |                   |                   |
|----|-------------------|-------------------|-------------------|
| H  | -1.89635377961877 | 1.04776911583318  | -0.15742277193477 |
| C  | -1.07015715519284 | 0.57747319876514  | -0.69092447408634 |
| C  | 1.04353984236833  | -0.62842734272926 | -2.08735486264903 |
| C  | -1.07872470742160 | 0.47544280925358  | -2.07801474169380 |
| C  | 0.02915558819733  | 0.05879593318371  | -0.00847154377253 |
| C  | 1.08684873335554  | -0.54412500765005 | -0.69581441669007 |
| C  | -0.04453205566667 | -0.12102319902659 | -2.82931683893426 |
| H  | 1.94060534272698  | -0.94437475856781 | -0.14898779598864 |
| H  | 1.87324890687792  | -1.09924731614356 | -2.61573711339363 |
| N  | -2.21570871751203 | 1.00746506402498  | -2.84018739047076 |
| H  | -1.96935504893128 | 0.80659084954999  | -3.86139736580662 |
| H  | -3.10447436866507 | 0.54218747821296  | -2.61383436633698 |
| H  | -2.34228304579858 | 2.02079470788395  | -2.71899432818240 |
| Se | -0.16221428239861 | -0.20933002510357 | -4.73940807730742 |
| Cl | 0.07905474767938  | 0.16871849251335  | 1.75818608724727  |

## 9. References

1. (a) Rheinboldt, H.; Giesbrecht, E. *J. Am. Chem. Soc.* **1950**, *72*, 866; (b) Syper, L.; Młochowski, J. *Tetrahedron* **1988**, *44*, 6119.
2. Giurg, M.; Kowal, E.; Muchalski, H.; Syper, L.; Młochowski, J. *Synth. Commun.* **2009**, *39*, 251.
3. (a) Galet, V.; Bernier, J.-L.; Hénichart, J.-P.; Lesieur, D.; Abadie, C.; Rochette, L.; Lindenbaum, A.; Chalas, J.; Faverie, J.-L. R.; Pfeiffer, B.; Renard, P. *J. Med. Chem.* **1994**, *37*, 2903; (b) Kloc, K.; Młochowski, J.; Osajda, K.; Syper, L.; Wójtowicz, H. *Tetrahedron Lett.* **2002**, *43*, 4071.
